# Supplementary material for: Cortical and Subcortical Brain Morphometry Differences Between Patients With Autism Spectrum Disorder and Healthy Individuals Across the Lifespan: Results From the ENIGMA ASD Working Group
Source: Atypon-hosted journal article supplement (doi:10.1176/appi.ajp.2017.17010100), 2017-11-17
Supplement: appi.ajp.2017.17010100.ds001.pdf [file appi.ajp.2017.17010100.ds001.pdf]

Data Supplement for van Rooij et al., Cortical and Subcortical Brain Morphometry Differences Between Patients With Autism Spectrum Disorder and Healthy Individuals Across the Lifespan: Results From the ENIGMA-ASD Working Group. Am J Psychiatry (doi: 10.1176/appi.ajp.2017.17010100)

## Contents

- FIGURE S1. Locations of the ENIGMA-ASD working groups that contributed to the current publication by sharing data, knowledge or resources
- Supplementary Methods
- TABLE S1. Demographics for All Participating Cohorts
- Supplementary Results
- TABLE S2. Meta-Analysis ASD v Control Comparison for Mean Subcortical Volume Outcomes
- TABLE S3. Mega-Analysis of Diagnosis on Subcortical Volumes, Corrected for Gender, Age, IQ, and Total Grey Matter Volume
- TABLE S4. Mega-Analysis With Groups Matched on IQ and Gender, ASD v Control Comparison Model Outcomes
- TABLE S5. Mega-Analysis With Groups Matched on ICV, ASD v Control Comparison Model Outcomes Corrected for Age, Sex, and Scan Site
- TABLE S6. Mega-Analysis With Correction for and Gender, Age, and Scan Site, But No Correction for IQ
- TABLE S7. Mega-Analysis of Effects of Medication Use (yes/no) and Comorbidities (yes/no) on the Subcortical Volumes and Cortical Thickness
- TABLE S8. Mega-Analysis of Main ASD Effect Split by Hemisphere
- TABLE S9. Mega-Analytic Regression Analysis of ADOS Scores With Subcortical Volumes
- TABLE S10. Mega-Analytic Regression Analysis Split by Adults (18+) and Children (18-)
- TABLE S11. Fractional Polynomial Best Model Fits for the Entire Sample
- TABLE S12. FDR Corrected p Values Calculated by Permutation Based Randomization Test
- TABLE S13. Effects Sizes (Cohen's d) for Frontal and Temporal Cortical Thickness Partitions That Showed a Significant Group Effect in the Main Mega-Analysis, As Well As All Subcortical Volumes for All Participating Sites
- FIGURE S2. Additional Fractional Polynomial Best Model Fits for Age in a Mega-Analysis of Brain Morphometry in Patients With Autism Spectrum Disorder (ASD) and Healthy Control Subjects
- References

**FIGURE S1. Locations of the ENIGMA-ASD Working Groups That Contributed to the Study by Sharing Data, Knowledge, or Resources**

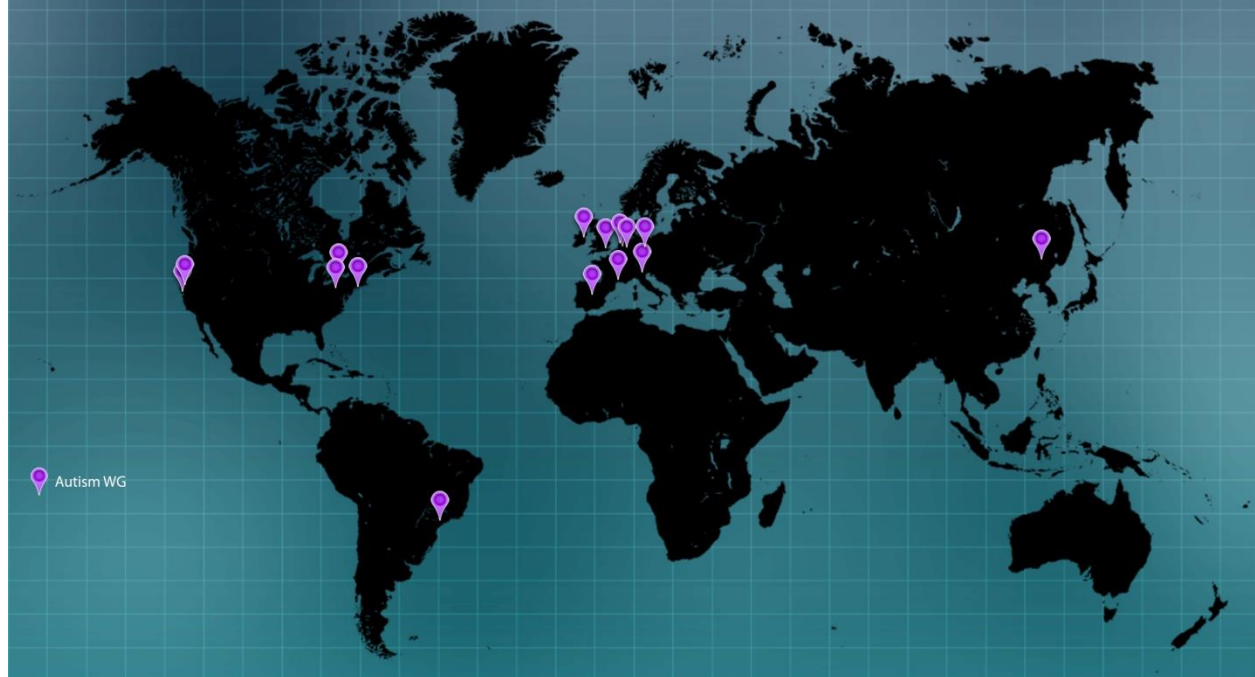

## Supplementary Methods

### *Quality Control of Freesurfer segmentation*

Quality control of the Freesurfer segmentation was performed using the standardized ENIGMA protocols, which can be found at <http://enigma.ini.usc.edu/protocols/imaging-protocols/>. All participating cohorts ran the Freesurfer pipeline on site, and followed the protocol to determine low quality segmentations. To detect low quality segmentations, a script was run to flag all outlying individual brain volumes (volumes with a value 2.689 standard deviation from the mean). Additionally, a script was run to produce histograms of distribution of volumes for each brain region, to further indicate anomalous values. Subsequently, a script was run to provide 3D images of all the subcortical volumes within the reconstructed native space brain template of each subject. The researchers visually inspected all flagged and anomalous individual brain volumes. If low quality segmentations were found, the researchers chose to either remove a single volume from the analysis, or remove an entire subject from further analyses. This QC led to the final exclusion of 117 subjects (5.4%), and the additional exclusion of 223 single volumes (0.64%). Of the excluded subjects, 73 had an ASD diagnosis (62%) and 44 were healthy controls (38%). Of the removed volumes, 133 were from subjects with ASD (60%) and 90 from healthy controls (40%). These percentages were not significantly different between subjects with ASD and healthy controls.

**TABLE S1. Demographics for All Participating Cohorts. Medication status indicates whether the presence of medication information for this cohort was available, Comorbidity status indicates whether information on comorbid disorders was available. These both also include samples where medication use and/or comorbidity were used as exclusion criteria. ADOS scores indicates the availability of classic ADOS total scores for this sample.**

| Name Site      | N Patients | N Controls | Age (Mean) | % Female | Scanner Type     | Field Strength | IQ  | Medication Status | Comorbidity Info | ADOS Scores |
|----------------|------------|------------|------------|----------|------------------|----------------|-----|-------------------|------------------|-------------|
| ABIDE_CALTECH  | 19         | 19         | 28.16      | 0.21     | Siemens Trio     | 3T             | Yes | No                | No               | Yes         |
| ABIDE_KKI      | 22         | 33         | 10.1       | 0.24     | Philips Achieva  | 3T             | Yes | No                | No               | Yes         |
| ABIDE_LEUVEN_1 | 14         | 15         | 22.59      | 0        | Philips Interna  | 3T             | Yes | No                | No               | No          |
| ABIDE_LEUVEN_2 | 15         | 20         | 14.16      | 0.23     | Philips Interna  | 3T             | Yes | No                | No               | No          |
| ABIDE_MAX_MUN  | 24         | 33         | 26.16      | 0.12     | Siemens Verio    | 3T             | Yes | No                | No               | Yes         |
| ABIDE_NYU      | 79         | 105        | 15.25      | 0.2      | Siemens Allegra  | 3T             | Yes | No                | No               | Yes         |
| ABIDE_OHSU     | 7          | 11         | 10.25      | 0        | Siemens Trio     | 3T             | Yes | No                | No               | Yes         |
| ABIDE_OLIN     | 20         | 16         | 16.81      | 0.14     | Siemens Allegra  | 3T             | Yes | No                | No               | Yes         |
| ABIDE_PITT     | 30         | 27         | 18.9       | 0.14     | Siemens Allegra  | 3T             | Yes | No                | No               | Yes         |
| ABIDE_SBL      | 15         | 15         | 34.37      | 0        | Philips Intera   | 3T             | Yes | No                | No               | Yes         |
| ABIDE_SDSU     | 20         | 16         | 14.41      | 0.19     | GE MR750         | 3T             | Yes | No                | No               | Yes         |
| ABIDE_STANFORD | 24         | 16         | 9.96       | 0.2      | GR Signa         | 3T             | Yes | No                | No               | Yes         |
| ABIDE_UM_1     | 54         | 52         | 13.41      | 0.25     | GE Signa         | 3T             | Yes | No                | No               | Yes         |
| ABIDE_UM_2     | 13         | 16         | 15.53      | 0.07     | GE Signa         | 3T             | Yes | No                | No               | Yes         |
| ABIDE_USM      | 54         | 42         | 22.01      | 0        | Siemens Trio     | 3T             | Yes | No                | No               | Yes         |
| ABIDE_YALE     | 28         | 27         | 12.72      | 0.29     | Siemens Magnetom | 3T             | Yes | No                | No               | Yes         |
| ABIDEII-BNI_1  | 29         | 29         | 38.5       | 0.00     | Philips Ingenia  | 3T             | Yes | Yes               | No               | Yes         |
| ABIDEII-EMC_1  | 27         | 27         | 8.09       | 0.21     | GE MR750         | 3T             | Yes | Yes               | No               | Yes         |
| ABIDEII-ETH_1  | 13         | 24         | 22.7       | 0.00     | Philips Achieva  | 3T             | Yes | Yes               | No               | Yes         |
| ABIDEII-GU_1   | 51         | 54         | 10.65      | 0.26     | Siemens TriTim   | 3T             | Yes | Yes               | No               | Yes         |
| ABIDEII-IP_1   | 32         | 22         | 20.41      | 0.56     | Siemens TriTim   | 1.5T           | Yes | Yes               | No               | Yes         |
| ABIDEII-IU_1   | 20         | 20         | 24.37      | 0.23     | Philips Achieva  | 3T             | Yes | Yes               | No               | Yes         |
| ABIDEII-KKI_1  | 54         | 154        | 10.34      | 0.34     | Philips Achieva  | 3T             | Yes | Yes               | No               | Yes         |
| ABIDEII-KUL_3  | 28         | 0          | 23.57      | 0.00     | Philips Achieva  | 3T             | Yes | Yes               | No               | Yes         |

|                      |             |             |       |      |                  |      |     |          |          |     |
|----------------------|-------------|-------------|-------|------|------------------|------|-----|----------|----------|-----|
| ABIDEII-NYU_1        | 47          | 30          | 9.88  | 0.09 | Siemens Allegra  | 3T   | Yes | Yes      | No       | Yes |
| ABIDEII-NYU_2        | 27          | 0           | 6.78  | 0.11 | Siemens Allegra  | 3T   | Yes | Yes      | No       | Yes |
| ABIDEII-OHSU_1       | 37          | 56          | 10.94 | 0.39 | Siemens Skyra    | 3T   | Yes | Yes      | No       | Yes |
| ABIDEII-OILH_2       | 21          | 34          | 23.2  | 0.35 | Siemens TriTim   | 3T   | Yes | Yes      | No       | Yes |
| ABIDEII-SDSU_1       | 33          | 25          | 13.04 | 0.16 | GE MR750         | 3T   | Yes | Yes      | No       | Yes |
| ABIDEII-TCD_1        | 21          | 21          | 15.19 | 0.00 | Philips Achieva  | 3T   | Yes | Yes      | No       | Yes |
| ABIDEII-UCD_1        | 17          | 14          | 14.86 | 0.26 | Siemens TriTim   | 3T   | Yes | Yes      | No       | Yes |
| ABIDEII-UCLA_1       | 15          | 16          | 10.73 | 0.19 | Siemens TriTim   | 3T   | Yes | Yes      | No       | Yes |
| ABIDEII-USM_1        | 17          | 15          | 21.35 | 0.16 | Siemens TriTim   | 3T   | Yes | Yes      | No       | Yes |
| BRC                  | 19          | 33          | 27.12 | 0    | GE Signa HDx     | 3T   | Yes | Excluded | No       | Yes |
| CMU                  | 13          | 14          | 16.9  | 0.13 | Siemens Magnetom | 3T   | Yes | Yes      | Excluded | Yes |
| FRANKFURT            | 13          | 12          | 18.08 | 0.15 |                  |      | Yes | Excluded | No       | No  |
| FSM                  | 40          | 40          | 4.1   | 0.5  | GE Signa         | 1.5T | Yes | Excluded | Excluded | Yes |
| MRC                  | 74          | 74          | 9.57  | 0.14 | GE Signa HDx     | 3T   | Yes | Yes      | Yes      | Yes |
| MYAD                 | 59          | 1           | 4.78  | 0    | Siemens symphony | 1.5T | No  | Excluded | No       | Yes |
| NIJMEGEN1            | 25          | 17          | 14.95 | 0.15 | Siemens Avanto   | 1.5T | Yes | No       | No       | No  |
| NIJMEGEN2            | 46          | 15          | 16.39 | 0.11 | Siemens Avanto   | 1.5T | Yes | No       | No       | No  |
| NIJMEGEN3            | 53          | 41          | 26.29 | 0.38 | Siemens Avanto   | 1.5T | No  | Yes      | No       | No  |
| SAO PAULO            | 15          | 20          | 12.31 | 0    | Philips          | 3T   | Yes | No       | No       | No  |
| OHSU                 | 41          | 40          | 11.46 | 0.26 | Siemens Trio     | 3T   | Yes | Yes      | Yes      | Yes |
| ParelladaHGGM        | 35          | 31          | 12.51 | 0.05 | Philips Intera   | 1.5T | Yes | No       | No       | no  |
| PITT                 | 45          | 44          | 14.6  | 0    | Siemens Allegra  | 3T   | Yes | Yes      | Yes      | Yes |
| TCD                  | 23          | 16          | 26.59 | 0.22 | Philips Achieva  | 3T   | Yes | Excluded | Excluded | Yes |
| TORONTO              | 102         | 144         | 12.06 | 0.37 | Siemens Trio     | 3T   | No  | No       | No       | No  |
| UMCU                 | 36          | 38          | 14.22 | 0.09 | Philips          | 1.5T | Yes | No       | No       | No  |
| <b>MEGA analysis</b> | <b>1651</b> | <b>1579</b> |       |      |                  |      |     |          |          |     |
| <b>META analysis</b> | <b>1644</b> | <b>1551</b> |       |      |                  |      |     |          |          |     |

## Supplementary Results

*Influence of ASD status on subcortical volumes, performed with classic meta-analysis*

**TABLE S2. Meta-Analysis ASD v Control Comparison for Mean Subcortical Volume Outcomes. All subcortical volumes are corrected for total ICV. Bold values indicate significant effects (p-values are FDR corrected). I<sup>2</sup> values indicate the heterogeneity of the effects between sites.**

| Subcortical                | N patients | N controls | Cohen's d    | Corrected p  | I <sup>2</sup> |
|----------------------------|------------|------------|--------------|--------------|----------------|
| Lateral Ventricles         | 985        | 1071       | <b>0.11</b>  | <b>0.031</b> | 46.45          |
| Thalamus                   | 982        | 1070       | <b>-0.09</b> | <b>0.043</b> | 21.33          |
| Caudate                    | 984        | 1070       | -0.05        | 0.460        | 64.63          |
| Putamen                    | 985        | 1071       | <b>-0.03</b> | <b>0.039</b> | 42.25          |
| Pallidum                   | 983        | 1071       | -0.03        | 0.556        | 33.66          |
| Hippocampus                | 981        | 1069       | -0.03        | 0.667        | 66.9           |
| Amygdala                   | 980        | 1068       | -0.06        | 0.282        | 48.21          |
| Nucleus accumbens          | 984        | 1071       | -0.05        | 0.291        | 34.58          |
| ICV                        | 985        | 1071       | <b>0.10</b>  | <b>0.036</b> | 37.78          |
| <b>Frontal</b>             |            |            |              |              |                |
| Superior Frontal           | 977        | 1059       | <b>0.11</b>  | <b>0.016</b> | 27.17          |
| Rostral Middle Frontal     | 976        | 1060       | <b>0.11</b>  | <b>0.013</b> | 37.76          |
| Caudal Middle Frontal      | 977        | 1059       | 0.06         | 0.147        | 40.74          |
| Pars Triangularis          | 975        | 1056       | 0.05         | 0.305        | 34.31          |
| Pars Orbitalis             | 977        | 1058       | 0.04         | 0.352        | 20.48          |
| Pars Opercularis           | 976        | 1057       | -0.03        | 0.489        | 34.41          |
| Medial Orbitofrontal       | 977        | 1058       | 0.08         | 0.063        | 22.92          |
| Lateral Orbitofrontal      | 977        | 1057       | 0.00         | 0.947        | 29.27          |
| Precentral                 | 974        | 1058       | <b>0.09</b>  | <b>0.050</b> | 26.25          |
| Paracentral                | 977        | 1056       | -0.05        | 0.233        | 38.04          |
| Frontal Pole               | 975        | 1059       | 0.04         | 0.372        | 41.15          |
| <b>Insula</b>              |            |            |              |              |                |
|                            | 976        | 1058       | -0.09        | 0.045        | 32.08          |
| <b>Cingulate</b>           |            |            |              |              |                |
| Rostral Anterior (Frontal) | 976        | 1056       | 0.01         | 0.777        | 34             |
| Caudal Anterior (Frontal)  | 974        | 1056       | 0.03         | 0.463        | 27.85          |
| Posterior (Parietal)       | 973        | 1060       | 0.05         | 0.313        | 28.38          |
| Isthmus (Parietal)         | 976        | 1056       | 0.05         | 0.294        | 27.97          |
| <b>Parietal</b>            |            |            |              |              |                |
| Superior Parietal          | 976        | 1058       | -0.09        | 0.057        | 40.22          |
| Inferior Parietal          | 977        | 1060       | -0.05        | 0.298        | 30.55          |
| Supramarginal              | 976        | 1056       | <b>-0.09</b> | <b>0.036</b> | 42.3           |
| Postcentral                | 973        | 1058       | -0.07        | 0.108        | 15.19          |
| Precuneus                  | 977        | 1060       | -0.08        | 0.089        | 26.4           |

| <b>Temporal</b>                       |     |      |              |              |       |
|---------------------------------------|-----|------|--------------|--------------|-------|
| Superior temporal                     | 975 | 1058 | <b>-0.15</b> | <b>0.001</b> | 23.64 |
| Middle temporal                       | 976 | 1060 | <b>-0.12</b> | <b>0.009</b> | 44.13 |
| Inferior temporal                     | 976 | 1059 | <b>-0.16</b> | <b>0.000</b> | 26.5  |
| Banks of the Superior Temporal Sulcus | 976 | 1060 | -0.07        | 0.126        | 17.27 |
| Fusiform                              | 975 | 1059 | <b>-0.19</b> | <b>0.000</b> | 20.04 |
| Transverse Temporal                   | 977 | 1059 | <b>-0.24</b> | <b>0.000</b> | 22.72 |
| Entorhinal                            | 973 | 1058 | <b>-0.24</b> | <b>0.000</b> | 31.93 |
| Temporal Pole                         | 972 | 1057 | <b>-0.14</b> | <b>0.001</b> | 43.66 |
| Parahippocampal                       | 974 | 1059 | <b>-0.11</b> | <b>0.019</b> | 43.98 |
| <b>Occipital</b>                      |     |      |              |              |       |
| Lateral Occipital                     | 975 | 1056 | -0.02        | 0.083        | 33.6  |
| Lingual                               | 976 | 1058 | -0.02        | 0.147        | 35.3  |
| Cuneus                                | 977 | 1057 | -0.06        | 0.177        | 33.6  |
| Pericalcarine                         | 977 | 1057 | -0.01        | 0.083        | 38.57 |

*Sensitivity analysis with correction for total grey matter volume*

Following the main ASD vs Control mega-analysis, the same model was run again for the subcortical volumes without correction for ICV, but instead correcting for total intracranial grey matter (total subcortical grey matter and total cortical grey matter output from Freesurfer). This since ICV potentially does not accurately reflect the current total grey matter volume. The results are depicted in Table S3. The correlation between ICV and total grey matter values is 0.78.

**TABLE S3. Mega-Analysis of Diagnosis on Subcortical Volumes, Corrected for Gender, Age, IQ, and Total Grey Matter Volume. Bold values indicate significant effects (p-values are FDR corrected).**

|                    | <b>N Controls</b> | <b>N Patients</b> | <b>Cohen's d</b> | <b>Corrected p</b> |
|--------------------|-------------------|-------------------|------------------|--------------------|
| Lateral Ventricles | 1606              | 1522              | <b>0.249</b>     | <b>0.016</b>       |
| Thalamus           | 1569              | 1482              | 0.074            | 0.448              |
| Caudate            | 1597              | 1494              | -0.130           | 0.206              |
| Putamen            | 1604              | 1517              | <b>-0.268</b>    | <b>0.012</b>       |
| Pallidum           | 1600              | 1518              | -0.191           | 0.069              |
| Hippocampus        | 1596              | 1509              | -0.023           | 0.793              |
| Amygdala           | 1595              | 1507              | -0.093           | 0.375              |
| Nucleus accumbens  | 1601              | 1508              | <b>-0.263</b>    | <b>0.012</b>       |

Results remain largely the same as in the main analysis where we corrected for ICV, only the pallidum volume is now just marginally significantly different between subjects with ASD and healthy controls after correction for FDR.

*Main ASD analysis with groups matched on gender and IQ.*

An additional sensitivity analysis as performed to exclude the potential influence of gender and IQ imbalances in the sample on the main effects. To this end, the full cohort was matched on IQ and Gender distribution using the MatchIt package in R (Ho, Imai, King, & Stuart, 2011). After matching, 1073 controls and 976 subjects with ASD remained in the analysis. Average IQ was 110.3 for controls and 107.28 for subjects with ASD respectively, with 17.17% females in the control groups and 13.81% females in the ASD group. The mega-analysis testing the main effect of diagnosis was subsequently repeated, with age added as a covariate in all analyses (see Table S4). The outcome of this sensitivity analyses indicate that the main effects of ASD on brain morphometry is robust, and is largely uninfluenced by the observed imbalance in IQ and gender distribution in our sample. Interestingly, some effects of cortical thickness in the parietal and occipital lobes are now also observed, indicating a more widespread posterior reduction in cortical thickness in this matched sample.

**TABLE S4. Mega-Analysis With Groups Matched on IQ and Gender, ASD v Control Comparison Model Outcomes. All subcortical volumes are corrected for total ICV. Bold values indicate significant effects (p-values are FDR corrected).**

| <b>Subcortical</b>         | <b>N controls</b> | <b>N patients</b> | <b>Cohen's d</b> | <b>Corrected p</b> |
|----------------------------|-------------------|-------------------|------------------|--------------------|
| Lateral Ventricles         | 1358              | 1229              | <b>0.16</b>      | <b>0.004</b>       |
| Thalamus                   | 1386              | 1262              | 0.02             | 0.683              |
| Caudate                    | 1388              | 1264              | -0.08            | 0.151              |
| Putamen                    | 1386              | 1262              | <b>-0.24</b>     | <b>0.000</b>       |
| Pallidum                   | 1383              | 1255              | <b>-0.18</b>     | <b>0.001</b>       |
| Hippocampus                | 1378              | 1252              | -0.03            | 0.671              |
| Amygdala                   | 1385              | 1253              | <b>-0.09</b>     | <b>0.012</b>       |
| Nucleus accumbens          | 1381              | 1263              | <b>-0.23</b>     | <b>0.000</b>       |
| ICV                        | 1358              | 1229              | <b>0.18</b>      | <b>0.002</b>       |
| <b>Frontal</b>             |                   |                   |                  |                    |
| Superior Frontal           | 1241              | 1173              | -0.01            | 0.879              |
| Rostral Middle Frontal     | 1240              | 1173              | 0.07             | 0.127              |
| Caudal Middle Frontal      | 1241              | 1173              | -0.05            | 0.281              |
| Pars Triangularis          | 1239              | 1168              | <b>0.16</b>      | <b>0.009</b>       |
| Pars Orbitalis             | 1240              | 1172              | 0.01             | 0.830              |
| Pars Opercularis           | 1239              | 1169              | <b>0.12</b>      | <b>0.005</b>       |
| Medial Orbitofrontal       | 1240              | 1171              | 0.08             | 0.096              |
| Lateral Orbitofrontal      | 1241              | 1172              | -0.06            | 0.208              |
| Precentral                 | 1238              | 1172              | <b>0.13</b>      | <b>0.003</b>       |
| Paracentral                | 1241              | 1168              | <b>0.12</b>      | <b>0.006</b>       |
| Frontal Pole               | 1237              | 1170              | 0.05             | 0.281              |
| <b>Insula</b>              |                   |                   |                  |                    |
|                            | 1240              | 1170              | -0.13            | 0.004              |
| <b>Cingulate</b>           |                   |                   |                  |                    |
| Rostral Anterior (Frontal) | 1238              | 1169              | -0.02            | 0.646              |

|                                       |      |      |              |              |
|---------------------------------------|------|------|--------------|--------------|
| Caudal Anterior (Frontal)             | 1237 | 1171 | -0.03        | 0.546        |
| Posterior (Parietal)                  | 1237 | 1173 | 0.05         | 0.285        |
| Isthmus (Parietal)                    | 1240 | 1169 | 0.04         | 0.366        |
| <b>Parietal</b>                       |      |      |              |              |
| Superior Parietal                     | 1240 | 1171 | <b>-0.13</b> | <b>0.003</b> |
| Inferior Parietal                     | 1241 | 1173 | -0.01        | 0.120        |
| Supramarginal                         | 1241 | 1171 | <b>-0.16</b> | <b>0.001</b> |
| Postcentral                           | 1238 | 1173 | -0.01        | 0.100        |
| Precuneus                             | 1241 | 1173 | -0.01        | 0.100        |
| <b>Temporal</b>                       |      |      |              |              |
| Superior temporal                     | 1240 | 1173 | <b>-0.15</b> | <b>0.001</b> |
| Middle temporal                       | 1241 | 1170 | <b>-0.16</b> | <b>0.001</b> |
| Inferior temporal                     | 1240 | 1173 | <b>-0.19</b> | <b>0.000</b> |
| Banks of the Superior Temporal Sulcus | 1238 | 1171 | <b>-0.11</b> | <b>0.016</b> |
| Fusiform                              | 1241 | 1171 | <b>-0.21</b> | <b>0.000</b> |
| Transverse Temporal                   | 1241 | 1170 | <b>-0.16</b> | <b>0.001</b> |
| Entorhinal                            | 1238 | 1167 | <b>-0.25</b> | <b>0.000</b> |
| Temporal Pole                         | 1233 | 1165 | <b>-0.15</b> | <b>0.001</b> |
| Parahippocampal                       | 1237 | 1168 | <b>-0.15</b> | <b>0.001</b> |
| <b>Occipital</b>                      |      |      |              |              |
| Lateral Occipital                     | 1239 | 1172 | <b>-0.14</b> | <b>0.002</b> |
| Lingual                               | 1240 | 1172 | <b>-0.13</b> | <b>0.003</b> |
| Cuneus                                | 1239 | 1171 | -0.03        | 0.460        |
| Pericalcarine                         | 1238 | 1166 | -0.06        | 0.208        |

*Main ASD subcortical analysis with groups matched on ICV*

An additional sensitivity analysis as performed to further exclude any potential influences of the total ICV difference on subcortical ASD diagnostic effects. To this end, the full cohort was matched on ICV between subjects with ASD and controls using the MatchIt package in R. After matching, 1388 controls and 1264 patients were included in the analysis. The results (see Table S5) verify that the reported subcortical effects are robust after matching for total ICV.



**TABLE S5. Mega-Analysis With Groups Matched on ICV, ASD v Control Comparison Model Outcomes Corrected for Age, Sex, and Scan Site. Bold values indicate significant effects (p-values are FDR corrected).**

| <b>Subcortical</b>         | <b>Cohen's d</b> | <b>N controls</b> | <b>N patients</b> | <b>Corrected p</b> |
|----------------------------|------------------|-------------------|-------------------|--------------------|
| Lateral Ventricles         | <b>0.11</b>      | <b>1358</b>       | <b>1229</b>       | <b>0.014</b>       |
| Thalamus                   | 0.01             | 1386              | 1262              | 0.761              |
| Caudate                    | -0.05            | 1388              | 1264              | 0.271              |
| Putamen                    | <b>-0.12</b>     | <b>1386</b>       | <b>1262</b>       | <b>0.007</b>       |
| Pallidum                   | <b>-0.11</b>     | <b>1383</b>       | <b>1255</b>       | <b>0.015</b>       |
| Hippocampus                | -0.03            | 1378              | 1252              | 0.555              |
| Amygdala                   | -0.06            | 1385              | 1253              | 0.218              |
| Nucleus accumbens          | <b>-0.15</b>     | <b>1381</b>       | <b>1263</b>       | <b>0.002</b>       |
| ICV                        | <b>0.11</b>      | <b>1358</b>       | <b>1229</b>       | <b>0.014</b>       |
| <b>Frontal</b>             |                  |                   |                   |                    |
| Superior Frontal           | 0.02             | 1483              | 1456              | 0.664              |
| Rostral Middle Frontal     | 0.06             | 1482              | 1457              | 0.168              |
| Caudal Middle Frontal      | -0.03            | 1483              | 1456              | 0.446              |
| Pars Triangularis          | 0.01             | 1481              | 1452              | 0.880              |
| Pars Orbitalis             | 0.02             | 1482              | 1456              | 0.582              |
| Pars Opercularis           | -0.08            | 1481              | 1453              | 0.060              |
| Medial Orbitofrontal       | 0.07             | 1481              | 1455              | 0.074              |
| Lateral Orbitofrontal      | -0.04            | 1483              | 1454              | 0.352              |
| Precentral                 | -0.13            | 1480              | 1455              | 0.002              |
| Paracentral                | -0.09            | 1483              | 1452              | 0.031              |
| Frontal Pole               | 0.04             | 1477              | 1454              | 0.352              |
| <b>Insula</b>              |                  |                   |                   |                    |
|                            | -0.12            | 1482              | 1453              | 0.003              |
| <b>Cingulate</b>           |                  |                   |                   |                    |
| Rostral Anterior (Frontal) | -0.03            | 1478              | 1452              | 0.541              |
| Caudal Anterior (Frontal)  | -0.01            | 1475              | 1450              | 0.910              |
| Posterior (Parietal)       | 0.07             | 1477              | 1456              | 0.094              |
| Isthmus (Parietal)         | 0.04             | 1481              | 1449              | 0.362              |
| <b>Parietal</b>            |                  |                   |                   |                    |
| Superior Parietal          | -0.10            | 1482              | 1455              | 0.012              |
| Inferior Parietal          | -0.09            | 1483              | 1457              | 0.033              |
| Supramarginal              | -0.14            | 1482              | 1453              | 0.001              |
| Postcentral                | -0.11            | 1479              | 1455              | 0.008              |
| Precuneus                  | -0.08            | 1482              | 1457              | 0.068              |
| <b>Temporal</b>            |                  |                   |                   |                    |
| Superior temporal          | -0.14            | 1480              | 1454              | 0.001              |
| Middle temporal            | -0.15            | 1482              | 1455              | 0.000              |
| Inferior temporal          | -0.17            | 1482              | 1455              | 0.000              |

|                                       |       |      |      |       |
|---------------------------------------|-------|------|------|-------|
| Banks of the Superior Temporal Sulcus | -0.10 | 1479 | 1455 | 0.021 |
| Fusiform                              | -0.21 | 1482 | 1454 | 0.000 |
| Transverse Temporal                   | -0.16 | 1483 | 1454 | 0.000 |
| Entorhinal                            | -0.25 | 1480 | 1452 | 0.000 |
| Temporal Pole                         | -0.17 | 1475 | 1449 | 0.000 |
| Parahippocampal                       | -0.14 | 1479 | 1452 | 0.001 |
| <b>Occipital</b>                      |       |      |      |       |
| Lateral Occipital                     | -0.12 | 1480 | 1453 | 0.003 |
| Lingual                               | -0.10 | 1481 | 1454 | 0.016 |
| Cuneus                                | 0.00  | 1480 | 1452 | 0.953 |
| Pericalcarine                         | -0.03 | 1480 | 1447 | 0.501 |

*Sensitivity analysis without corrections for IQ.*

By excluding potential influence of IQ on the diagnostic effects, it may also be possible to remove variance of interest, especially when IQ and the diagnostic status (ASD or healthy control) may be conceptually linked. To exclude this possibility, the main mega-analysis model was run performed again without IQ included in the covariance list, as depicted in Table S5. The results do not significantly differ from the model corrected for IQ, again confirming that the between-group diagnostic results are not influenced by the differences in IQ between these groups.

**TABLE S6. Mega-Analysis With Correction for and Gender, Age, and Scan Site, But No Correction for IQ. Bold values indicate significant effects (p-values are FDR corrected).**

| <b>Subcortical</b>     | <b>N controls</b> | <b>N patients</b> | <b>Cohen's d</b> | <b>Corrected p</b> |
|------------------------|-------------------|-------------------|------------------|--------------------|
| Lateral Ventricles     | 1575              | 1485              | <b>0.13</b>      | <b>0.003</b>       |
| Thalamus               | 1603              | 1497              | 0.05             | 0.348              |
| Caudate                | 1610              | 1520              | 0.00             | 0.990              |
| Putamen                | 1606              | 1521              | -0.07            | 0.168              |
| Pallidum               | 1602              | 1512              | <b>-0.09</b>     | <b>0.046</b>       |
| Hippocampus            | 1601              | 1510              | -0.01            | 0.807              |
| Amygdala               | 1607              | 1511              | <b>-0.09</b>     | <b>0.036</b>       |
| Nucleus accumbens      | 1602              | 1521              | <b>-0.10</b>     | <b>0.019</b>       |
| ICV                    | 1612              | 1525              | <b>0.06</b>      | <b>0.016</b>       |
| <b>Frontal</b>         |                   |                   |                  |                    |
| Superior Frontal       | 1527              | 1532              | <b>0.17</b>      | <b>0.000</b>       |
| Rostral Middle Frontal | 1526              | 1533              | <b>0.23</b>      | <b>0.000</b>       |
| Caudal Middle Frontal  | 1527              | 1532              | <b>0.10</b>      | <b>0.026</b>       |
| Pars Triangularis      | 1525              | 1528              | <b>0.13</b>      | <b>0.005</b>       |
| Pars Orbitalis         | 1526              | 1531              | <b>0.13</b>      | <b>0.005</b>       |
| Pars Opercularis       | 1525              | 1529              | 0.03             | 0.576              |
| Medial Orbitofrontal   | 1525              | 1531              | <b>0.14</b>      | <b>0.002</b>       |

|                                       |      |      |              |              |
|---------------------------------------|------|------|--------------|--------------|
| Lateral Orbitofrontal                 | 1527 | 1530 | 0.04         | 0.438        |
| Precentral                            | 1524 | 1531 | -0.03        | 0.576        |
| Paracentral                           | 1527 | 1528 | -0.01        | 0.847        |
| Frontal Pole                          | 1521 | 1530 | <b>0.12</b>  | <b>0.006</b> |
| <b>Insula</b>                         |      |      |              |              |
|                                       | 1525 | 1529 | -0.07        | 0.135        |
| <b>Cingulate</b>                      |      |      |              |              |
| Rostral Anterior (Frontal)            | 1522 | 1528 | 0.03         | 0.576        |
| Caudal Anterior (Frontal)             | 1519 | 1526 | 0.03         | 0.576        |
| Posterior (Parietal)                  | 1521 | 1532 | <b>0.13</b>  | <b>0.005</b> |
| Isthmus (Parietal)                    | 1525 | 1525 | 0.08         | 0.087        |
| <b>Parietal</b>                       |      |      |              |              |
| Superior Parietal                     | 1526 | 1531 | -0.03        | 0.567        |
| Inferior Parietal                     | 1527 | 1533 | 0.00         | 0.963        |
| Supramarginal                         | 1526 | 1529 | -0.07        | 0.114        |
| Postcentral                           | 1523 | 1531 | -0.02        | 0.665        |
| Precuneus                             | 1526 | 1533 | -0.01        | 0.835        |
| <b>Temporal</b>                       |      |      |              |              |
| Superior temporal                     | 1524 | 1530 | -0.06        | 0.176        |
| Middle temporal                       | 1526 | 1530 | <b>-0.10</b> | <b>0.037</b> |
| Inferior temporal                     | 1526 | 1531 | <b>-0.16</b> | <b>0.000</b> |
| Banks of the Superior Temporal Sulcus | 1523 | 1531 | -0.02        | 0.635        |
| Fusiform                              | 1525 | 1530 | <b>-0.20</b> | <b>0.000</b> |
| Transverse Temporal                   | 1527 | 1530 | -0.08        | 0.076        |
| Entorhinal                            | 1523 | 1527 | <b>-0.22</b> | <b>0.000</b> |
| Temporal Pole                         | 1518 | 1523 | <b>-0.12</b> | <b>0.007</b> |
| Parahippocampal                       | 1522 | 1528 | <b>-0.09</b> | <b>0.039</b> |
| <b>Occipital</b>                      |      |      |              |              |
| Lateral Occipital                     | 1524 | 1529 | -0.08        | 0.091        |
| Lingual                               | 1525 | 1530 | -0.06        | 0.206        |
| Cuneus                                | 1524 | 1528 | 0.02         | 0.646        |
| Pericalcarine                         | 1524 | 1523 | -0.02        | 0.646        |

*Sensitivity analyses on the effects of medication use and comorbidity.*

For all samples, information about medication use and comorbidity were collected where available. Medication use was available for 858 subjects with ASD (625 without prescribed medication, 233 with prescribed medication). Due to the large variation of medication types (e.g. stimulants, atypical antipsychotics, antidepressants, anxiolytics), no further subdivision on medication type was possible. A linear mixed effects model was run to see if these two groups differed on subcortical brain volumes differences, with age, gender and IQ added as covariates and site as a random factor. No significant effects of medication use on brain volumes were observed (Table S7).

Similarly, information on comorbid disorders was available for 951 subjects with ASD (803 without comorbid disorders, 148 subjects with some kind of comorbidity). Given the large variety of comorbidities (e.g. Depression, ADHD, OCD, Anxiety, Tourettes), no further useful subdivisions could be made within this sample. Hence, a linear mixed effects model was run to investigate the effect of comorbidity on subcortical brain volumes. Age, gender and IQ were added as covariates and Site was added as a random factor. No significant differences were observed between subjects with and without comorbidities (Table S7).

**TABLE S7. Mega-Analysis of Effects of Medication Use (yes/no) and Comorbidities (yes/no) on the Subcortical Volumes and Cortical Thickness. All models corrected for sex, age, IQ and scan -site. Bold values indicate significant effects (p-values are FDR corrected).**

| <b>Subcortical</b>         | <b>Cohen's d<br/>Medication</b> | <b>Corrected p<br/>Medication</b> | <b>Cohen's d<br/>Comorbidity</b> | <b>Corrected p<br/>Comorbidity</b> |
|----------------------------|---------------------------------|-----------------------------------|----------------------------------|------------------------------------|
| Lateral Ventricles         | -0.21                           | 0.507                             | -0.14                            | 0.429                              |
| Thalamus                   | -0.15                           | 0.638                             | -0.21                            | 0.261                              |
| Caudate                    | -0.14                           | 0.638                             | 0.16                             | 0.381                              |
| Putamen                    | -0.25                           | 0.448                             | -0.32                            | 0.073                              |
| Pallidum                   | -0.07                           | 0.838                             | 0.09                             | 0.604                              |
| Hippocampus                | -0.10                           | 0.787                             | 0.04                             | 0.828                              |
| Amygdala                   | 0.02                            | 0.948                             | 0.02                             | 0.916                              |
| Nucleus accumbens          | -0.32                           | 0.293                             | 0.06                             | 0.722                              |
| ICV                        | 0.01                            | 0.948                             | -0.05                            | 0.774                              |
| <b>Frontal</b>             |                                 |                                   |                                  |                                    |
| Superior Frontal           | -0.07                           | 0.724                             | -0.39                            | 0.143                              |
| Rostral Middle Frontal     | -0.24                           | 0.277                             | -0.35                            | 0.208                              |
| Caudal Middle Frontal      | -0.19                           | 0.328                             | -0.30                            | 0.220                              |
| Pars Triangularis          | -0.18                           | 0.328                             | -0.26                            | 0.264                              |
| Pars Orbitalis             | -0.18                           | 0.328                             | -0.72                            | 0.001                              |
| Pars Opercularis           | -0.22                           | 0.289                             | -0.27                            | 0.251                              |
| Medial Orbitofrontal       | -0.36                           | 0.108                             | -0.21                            | 0.317                              |
| Lateral Orbitofrontal      | -0.37                           | 0.108                             | -0.43                            | 0.124                              |
| Precentral                 | -0.33                           | 0.129                             | -0.46                            | 0.095                              |
| Paracentral                | -0.11                           | 0.574                             | -0.22                            | 0.317                              |
| Frontal Pole               | -0.29                           | 0.172                             | -0.30                            | 0.220                              |
| <b>Insula</b>              |                                 |                                   |                                  |                                    |
|                            | -0.36                           | 0.108                             | -0.30                            | 0.220                              |
| <b>Cingulate</b>           |                                 |                                   |                                  |                                    |
| Rostral Anterior (Frontal) | -0.10                           | 0.574                             | -0.14                            | 0.476                              |
| Caudal Anterior (Frontal)  | -0.10                           | 0.574                             | -0.09                            | 0.634                              |
| Posterior (Parietal)       | 0.02                            | 0.896                             | -0.15                            | 0.450                              |
| Isthmus (Parietal)         | -0.04                           | 0.795                             | -0.34                            | 0.220                              |
| <b>Parietal</b>            |                                 |                                   |                                  |                                    |
| Superior Parietal          | -0.13                           | 0.500                             | -0.15                            | 0.450                              |

|                                       |              |              |       |       |
|---------------------------------------|--------------|--------------|-------|-------|
| Inferior Parietal                     | -0.18        | 0.328        | -0.20 | 0.317 |
| Supramarginal                         | -0.19        | 0.328        | -0.42 | 0.124 |
| Postcentral                           | -0.29        | 0.172        | -0.31 | 0.220 |
| Precuneus                             | -0.11        | 0.574        | -0.21 | 0.317 |
| <b>Temporal</b>                       |              |              |       |       |
| Superior temporal                     | -0.32        | 0.140        | -0.29 | 0.223 |
| Middle temporal                       | -0.34        | 0.129        | -0.27 | 0.251 |
| Inferior temporal                     | <b>-0.48</b> | <b>0.020</b> | -0.23 | 0.317 |
| Banks of the Superior Temporal Sulcus | -0.27        | 0.201        | -0.20 | 0.317 |
| Fusiform                              | -0.26        | 0.229        | -0.31 | 0.220 |
| Transverse Temporal                   | -0.19        | 0.328        | -0.22 | 0.317 |
| Entorhinal                            | -0.20        | 0.328        | -0.15 | 0.450 |
| Temporal Pole                         | -0.22        | 0.289        | -0.21 | 0.317 |
| Parahippocampal                       | -0.31        | 0.152        | -0.33 | 0.220 |
| <b>Occipital</b>                      |              |              |       |       |
| Lateral Occipital                     | -0.19        | 0.328        | -0.23 | 0.317 |
| Lingual                               | -0.22        | 0.292        | -0.41 | 0.129 |
| Cuneus                                | -0.24        | 0.277        | -0.21 | 0.317 |
| Pericalcarine                         | -0.05        | 0.772        | -0.30 | 0.220 |

*Main ASD analysis split by hemisphere.*

Given previous findings on lateralization effects of morphometric features in ASD, the main ASD vs Controls analysis was repeated split by hemisphere. The model was kept identical to the main group analysis. In general, both subcortical volume and cortical thickness effects are robust over both hemispheres, with decreased striatal volumes and temporal cortical thickness observed in subjects with ASD over both hemispheres, as well as increased frontal cortical thickness.

**TABLE S8. Mega-Analysis of Main ASD Effect Split by Hemisphere. Separate models were run for each hemisphere. L indicates left hemisphere, R indicates hemisphere. All models corrected for sex, age, IQ and scan -site. Bold values indicate significant effects (p-values are FDR corrected).**

|                                       |   | N               | N               | Cohen's      | Corrected    |   | N        | N               | Cohen's      | Corrected    |
|---------------------------------------|---|-----------------|-----------------|--------------|--------------|---|----------|-----------------|--------------|--------------|
| <b>Subcortical</b>                    |   | <b>Controls</b> | <b>Patients</b> | <b>d</b>     | <b>p</b>     |   | <b>s</b> | <b>Patients</b> | <b>d</b>     | <b>p</b>     |
| Lateral Ventricles                    | L | 1112            | 1035            | <b>0.11</b>  | <b>0.028</b> | R | 457      | 447             | <b>0.13</b>  | <b>0.054</b> |
| Thalamus                              | L | 1123            | 1030            | -0.01        | 0.868        | R | 474      | 464             | -0.02        | 0.755        |
| Caudate                               | L | 1127            | 1051            | -0.08        | 0.101        | R | 477      | 466             | -0.01        | 0.922        |
| Putamen                               | L | 1124            | 1052            | <b>-0.10</b> | <b>0.036</b> | R | 476      | 466             | <b>-0.12</b> | <b>0.052</b> |
| Pallidum                              | L | 1123            | 1044            | -0.09        | 0.076        | R | 473      | 465             | -0.09        | 0.164        |
| Hippocampus                           | L | 1122            | 1045            | -0.03        | 0.616        | R | 473      | 462             | <b>-0.13</b> | <b>0.052</b> |
| Amygdala                              | L | 1128            | 1046            | -0.08        | 0.101        | R | 473      | 462             | <b>-0.14</b> | <b>0.034</b> |
| Nucleus accumbens                     | L | 1124            | 1054            | <b>-0.14</b> | <b>0.008</b> | R | 472      | 464             | <b>-0.15</b> | <b>0.026</b> |
| <b>Frontal</b>                        |   |                 |                 |              |              |   |          |                 |              |              |
| Superior Frontal                      | L | 1574            | 1659            | <b>0.10</b>  | <b>0.019</b> | R | 1574     | 1657            | <b>0.20</b>  | <b>0.000</b> |
| Rostral Middle Frontal                | L | 1573            | 1659            | <b>0.14</b>  | <b>0.000</b> | R | 1573     | 1658            | <b>0.22</b>  | <b>0.000</b> |
| Caudal Middle Frontal                 | L | 1574            | 1657            | 0.05         | 0.275        | R | 1574     | 1658            | <b>0.09</b>  | <b>0.038</b> |
| Pars Triangularis                     | L | 1573            | 1657            | <b>0.09</b>  | <b>0.038</b> | R | 1573     | 1655            | <b>0.10</b>  | <b>0.029</b> |
| Pars Orbitalis                        | L | 1573            | 1658            | 0.07         | 0.087        | R | 1574     | 1657            | <b>0.13</b>  | <b>0.002</b> |
| Pars Opercularis                      | L | 1574            | 1658            | -0.01        | 0.897        | R | 1572     | 1655            | 0.02         | 0.633        |
| Medial Orbitofrontal                  | L | 1572            | 1658            | 0.08         | 0.076        | R | 1574     | 1657            | <b>0.18</b>  | <b>0.000</b> |
| Lateral Orbitofrontal                 | L | 1574            | 1657            | 0.05         | 0.287        | R | 1574     | 1656            | 0.03         | 0.454        |
| Precentral                            | L | 1570            | 1657            | -0.06        | 0.151        | R | 1572     | 1657            | -0.05        | 0.249        |
| Paracentral                           | L | 1574            | 1657            | 0.01         | 0.803        | R | 1574     | 1655            | -0.04        | 0.438        |
| Frontal Pole                          | L | 1570            | 1658            | 0.08         | 0.067        | R | 1571     | 1656            | 0.09         | 0.029        |
| <b>Insula</b>                         |   |                 |                 |              |              |   |          |                 |              |              |
|                                       | L | 1570            | 1656            | -0.01        | 0.792        | R | 1570     | 1654            | -0.10        | 0.027        |
| <b>Cingulate</b>                      |   |                 |                 |              |              |   |          |                 |              |              |
| Rostral Anterior (Frontal)            | L | 1570            | 1658            | -0.05        | 0.255        | R | 1573     | 1653            | <b>0.09</b>  | <b>0.040</b> |
| Caudal Anterior (Frontal)             | L | 1571            | 1658            | 0.02         | 0.633        | R | 1569     | 1652            | 0.02         | 0.680        |
| Posterior (Parietal)                  | L | 1572            | 1659            | 0.06         | 0.215        | R | 1570     | 1657            | <b>0.15</b>  | <b>0.000</b> |
| Isthmus (Parietal)                    | L | 1573            | 1653            | 0.02         | 0.653        | R | 1573     | 1655            | <b>0.13</b>  | <b>0.002</b> |
| <b>Parietal</b>                       |   |                 |                 |              |              |   |          |                 |              |              |
| Superior Parietal                     | L | 1573            | 1656            | 0.02         | 0.697        | R | 1573     | 1655            | -0.04        | 0.438        |
| Inferior Parietal                     | L | 1573            | 1659            | 0.01         | 0.889        | R | 1573     | 1657            | 0.03         | 0.574        |
| Supramarginal                         | L | 1572            | 1656            | -0.04        | 0.370        | R | 1574     | 1654            | -0.08        | 0.067        |
| Postcentral                           | L | 1572            | 1657            | -0.02        | 0.633        | R | 1571     | 1656            | -0.03        | 0.574        |
| Precuneus                             | L | 1574            | 1659            | 0.04         | 0.427        | R | 1573     | 1658            | 0.01         | 0.828        |
| <b>Temporal</b>                       |   |                 |                 |              |              |   |          |                 |              |              |
| Superior temporal                     | L | 1570            | 1655            | <b>-0.09</b> | <b>0.040</b> | R | 1573     | 1655            | -0.05        | 0.244        |
| Middle temporal                       | L | 1570            | 1656            | <b>-0.09</b> | <b>0.029</b> | R | 1574     | 1655            | <b>-0.09</b> | <b>0.040</b> |
| Inferior temporal                     | L | 1571            | 1657            | -0.05        | 0.256        | R | 1574     | 1657            | <b>-0.19</b> | <b>0.000</b> |
| Banks of the Superior Temporal Sulcus | L | 1569            | 1650            | 0.00         | 0.986        | R | 1566     | 1655            | -0.05        | 0.235        |
| Fusiform                              | L |                 |                 |              |              |   |          |                 |              |              |

|                     |   |      |      |              |              |   |      |      |              |              |
|---------------------|---|------|------|--------------|--------------|---|------|------|--------------|--------------|
| Transverse Temporal | L | 1574 | 1658 | -0.06        | 0.142        | R | 1574 | 1656 | <b>-0.13</b> | <b>0.001</b> |
| Entorhinal          | L | 1567 | 1654 | <b>-0.15</b> | <b>0.000</b> | R | 1562 | 1642 | <b>-0.23</b> | <b>0.000</b> |
| Temporal Pole       | L | 1570 | 1654 | <b>-0.09</b> | <b>0.032</b> | R | 1569 | 1652 | <b>-0.15</b> | <b>0.000</b> |
| Parahippocampal     | L | 1572 | 1656 | -0.08        | 0.065        | R | 1571 | 1656 | <b>-0.10</b> | <b>0.019</b> |
| <b>Occipital</b>    |   |      |      |              |              |   |      |      |              |              |
| Lateral Occipital   | L | 1569 | 1655 | -0.01        | 0.828        | R | 1574 | 1655 | <b>-0.08</b> | <b>0.045</b> |
| Lingual             | L | 1572 | 1658 | -0.01        | 0.859        | R | 1574 | 1656 | -0.06        | 0.180        |
| Cuneus              | L | 1573 | 1655 | 0.06         | 0.217        | R | 1572 | 1654 | 0.07         | 0.094        |
| Pericalcarine       | L | 1572 | 1654 | 0.01         | 0.842        | R | 1573 | 1652 | 0.00         | 0.986        |

### *Sensitivity analyses on the effects of ASD severity*

ASD severity was collected for all subjects with ASD where available in our cohort. The most commonly available measure was the total ADOS\_G score (Lord et al., 2000), which was available for 1545 subjects with ASD. Additionally, the Social Responsiveness Scale (SRS), was available for 1302 subjects with ASD. A simple regression was performed, predicting subcortical brain volumes based on ADOS total scores, with age, gender and scansite added as covariates. The results of this analysis are depicted in Table S6. Results are mostly consistent with the direction of the group contrast, i.e. in ICV and lateral ventricles higher ADOS scores are associated with larger volume, while higher ADOS scores are associated with lower volumes in the amygdala, thalamus and nucleus accumbens. Greater thickness is associated with higher ADOS scores in the frontal areas, and lower thickness with higher ADOS scores in the temporal areas. Interestingly, insular, cingulate, parietal and occipital regions also show associations with ADOS scores, with higher ADOS scores generally associated with increased thickness in cingulate, parietal and occipital regions, while lower cortical thickness is associated with higher ADOS scores in the insula. SRS showed no significant associations with subcortical volumes or cortical thickness in any of the partitions.

**TABLE S9. Mega-Analytic Regression Analysis of ADOS Scores With Subcortical Volumes. All subcortical volumes are corrected for total ICV, age and gender were added as covariates. Bold values indicate significant effects (p-values are FDR corrected).**

| Subcortical                | n    | Estimate (ADOS) | Corrected p (ADOS) | R <sup>2</sup> (ADOS) |
|----------------------------|------|-----------------|--------------------|-----------------------|
| Lateral Ventricles         | 1538 | <b>87.85</b>    | <b>0.000</b>       | <b>0.059</b>          |
| Thalamus                   | 1538 | <b>-21.37</b>   | <b>0.000</b>       | <b>0.034</b>          |
| Caudate                    | 1538 | -4.84           | 0.059              | 0.004                 |
| Putamen                    | 1538 | 7.25            | 0.059              | 0.004                 |
| Pallidum                   | 1538 | -0.41           | 0.726              | 0.001                 |
| Hippocampus                | 1538 | <b>-21.29</b>   | <b>0.000</b>       | <b>0.074</b>          |
| Amygdala                   | 1538 | <b>-11.88</b>   | <b>0.000</b>       | <b>0.093</b>          |
| Nucleus accumbens          | 1538 | <b>-3.40</b>    | <b>0.000</b>       | <b>0.000</b>          |
| ICV                        | 1538 | <b>352.38</b>   | <b>0.007</b>       | <b>0.071</b>          |
| <b>Frontal</b>             |      |                 |                    |                       |
| Superior Frontal           | 1545 | 0.000           | 0.598              | 0.73                  |
| Rostral Middle Frontal     | 1545 | <b>0.005</b>    | <b>0.000</b>       | <b>0.70</b>           |
| Caudal Middle Frontal      | 1545 | <b>0.003</b>    | <b>0.000</b>       | <b>0.68</b>           |
| Pars Triangularis          | 1545 | <b>0.004</b>    | <b>0.000</b>       | <b>0.69</b>           |
| Pars Orbitalis             | 1545 | -0.002          | 0.065              | 0.61                  |
| Pars Opercularis           | 1545 | 0.001           | 0.103              | 0.69                  |
| Medial Orbitofrontal       | 1545 | 0.000           | 0.735              | 0.53                  |
| Lateral Orbitofrontal      | 1545 | <b>0.007</b>    | <b>0.000</b>       | <b>0.67</b>           |
| Precentral                 | 1545 | <b>0.003</b>    | <b>0.000</b>       | <b>0.57</b>           |
| Paracentral                | 1545 | <b>-0.002</b>   | <b>0.000</b>       | <b>0.64</b>           |
| Frontal Pole               | 1545 | <b>0.005</b>    | <b>0.000</b>       | <b>0.39</b>           |
| <b>Insula</b>              |      |                 |                    |                       |
|                            | 1545 | <b>-0.003</b>   | <b>0.000</b>       | <b>0.43</b>           |
| <b>Cingulate</b>           |      |                 |                    |                       |
| Rostral Anterior (Frontal) | 1545 | <b>0.009</b>    | <b>0.000</b>       | <b>0.36</b>           |
| Caudal Anterior (Frontal)  | 1545 | <b>0.014</b>    | <b>0.000</b>       | <b>0.24</b>           |
| Posterior (Parietal)       | 1545 | <b>0.013</b>    | <b>0.000</b>       | <b>0.45</b>           |
| Isthmus (Parietal)         | 1545 | -0.011          | 0.071              | 0.03                  |
| <b>Parietal</b>            |      |                 |                    |                       |
| Superior Parietal          | 1545 | 0.001           | 0.069              | 0.76                  |
| Inferior Parietal          | 1545 | 0.001           | 0.080              | 0.83                  |
| Supramarginal              | 1545 | <b>0.002</b>    | <b>0.000</b>       | <b>0.84</b>           |
| Postcentral                | 1545 | <b>0.004</b>    | <b>0.000</b>       | <b>0.60</b>           |
| Precuneus                  | 1545 | <b>-0.006</b>   | <b>0.000</b>       | <b>0.79</b>           |
| <b>Temporal</b>            |      |                 |                    |                       |
| Superior temporal          | 1545 | <b>-0.002</b>   | <b>0.002</b>       | <b>0.51</b>           |
| Middle temporal            | 1545 | 0.001           | 0.081              | 0.61                  |



|                                       |      |               |              |             |
|---------------------------------------|------|---------------|--------------|-------------|
| Inferior temporal                     | 1545 | -0.001        | 0.157        | 0.56        |
| Banks of the Superior Temporal Sulcus | 1545 | -0.001        | 0.054        | 0.57        |
| Fusiform                              | 1545 | <b>-0.006</b> | <b>0.000</b> | <b>0.56</b> |
| Transverse Temporal                   | 1545 | <b>-0.002</b> | <b>0.020</b> | <b>0.39</b> |
| Entorhinal                            | 1545 | <b>-0.018</b> | <b>0.000</b> | <b>0.17</b> |
| Temporal Pole                         | 1545 | <b>-0.014</b> | <b>0.000</b> | <b>0.13</b> |
| Parahippocampal                       | 1545 | <b>-0.014</b> | <b>0.000</b> | <b>0.23</b> |
| <b>Occipital</b>                      |      |               |              |             |
| Lateral Occipital                     | 1545 | <b>0.003</b>  | <b>0.000</b> | <b>0.52</b> |
| Lingual                               | 1545 | <b>0.003</b>  | <b>0.000</b> | <b>0.33</b> |
| Cuneus                                | 1545 | <b>0.006</b>  | <b>0.000</b> | <b>0.37</b> |
| Pericalcarine                         | 1545 | <b>0.010</b>  | <b>0.000</b> | <b>0.20</b> |

*Mega analysis of Diagnosis effects split by Adult and Children*

In order to further explore the development of subcortical volumes and cortical thickness in ASD, the cohort was subdivided in subjects above and below 18 years of age. The results of the mega-analysis are reported in Table S10. As can be observed, the strongest effects are generally observed in children, which also constitute the largest part of the sample. Nevertheless, the overall pattern of result are stable and robust over this subdivision, with similar volumes reductions observed in the subcortical volumes in ASD as well as higher cortical thickness in frontal areas and reduced cortical thickness in temporal areas.

**TABLE S10. Mega-Analytic Regression Analysis Split by Adults (18+) and Children (18-). All subcortical volumes are corrected for total ICV, sex, age, IQ and scan-site were added as covariates. Bold values indicate significant effects (p-values are FDR corrected).**

| Subcortical            | N                 | N                 | Cohen's      | Corrected    | N          | N               | Cohen's         | Corrected    |
|------------------------|-------------------|-------------------|--------------|--------------|------------|-----------------|-----------------|--------------|
|                        | Controls Children | Patients Children | d Children   |              | p Children | Controls Adults | Patients Adults |              |
| Lateral Ventricles     | 1112              | 1035              | <b>0.11</b>  | <b>0.028</b> | 457        | 447             | <b>0.13</b>     | <b>0.054</b> |
| Thalamus               | 1123              | 1030              | -0.01        | 0.868        | 474        | 464             | -0.02           | 0.755        |
| Caudate                | 1127              | 1051              | -0.08        | 0.101        | 477        | 466             | -0.01           | 0.922        |
| Putamen                | 1124              | 1052              | <b>-0.10</b> | <b>0.036</b> | 476        | 466             | <b>-0.12</b>    | <b>0.052</b> |
| Pallidum               | 1123              | 1044              | <b>-0.09</b> | <b>0.076</b> | 473        | 465             | -0.09           | 0.164        |
| Hippocampus            | 1122              | 1045              | -0.03        | 0.616        | 473        | 462             | <b>-0.13</b>    | <b>0.052</b> |
| Amygdala               | 1128              | 1046              | -0.08        | 0.101        | 473        | 462             | <b>-0.14</b>    | <b>0.034</b> |
| Nucleus accumbens      | 1124              | 1054              | <b>-0.14</b> | <b>0.008</b> | 472        | 464             | <b>-0.15</b>    | <b>0.026</b> |
| <b>Frontal</b>         |                   |                   |              |              |            |                 |                 |              |
| Superior Frontal       | 992               | 1016              | <b>0.144</b> | <b>0.001</b> | 468        | 438             | 0.273           | 0.063        |
| Rostral Middle Frontal | 991               | 1016              | <b>0.180</b> | <b>0.000</b> | 468        | 439             | <b>0.262</b>    | <b>0.009</b> |
| Caudal Middle Frontal  | 992               | 1015              | 0.062        | 0.172        | 468        | 439             | <b>0.110</b>    | <b>0.000</b> |
| Pars Triangularis      | 991               | 1012              | 0.022        | 0.629        | 467        | 438             | 0.356           | 0.734        |
| Pars Orbitalis         | 992               | 1015              | <b>0.087</b> | <b>0.054</b> | 467        | 439             | 0.218           | 0.124        |

|                                       |     |      |               |              |     |     |               |              |
|---------------------------------------|-----|------|---------------|--------------|-----|-----|---------------|--------------|
| Pars Opercularis                      | 991 | 1014 | -0.037        | 0.414        | 468 | 437 | <b>0.146</b>  | <b>0.018</b> |
| Medial Orbitofrontal                  | 990 | 1015 | <b>0.096</b>  | <b>0.033</b> | 468 | 438 | <b>0.213</b>  | <b>0.001</b> |
| Lateral Orbitofrontal                 | 992 | 1015 | -0.022        | 0.623        | 468 | 437 | 0.186         | 0.985        |
| Precentral                            | 991 | 1014 | -0.022        | 0.631        | 467 | 439 | -0.105        | 0.185        |
| Paracentral                           | 992 | 1012 | 0.000         | 0.998        | 468 | 438 | -0.001        | 0.323        |
| Frontal Pole                          | 988 | 1014 | <b>0.093</b>  | <b>0.039</b> | 466 | 438 | 0.179         | 0.225        |
| <b>Insula</b>                         |     |      |               |              |     |     |               |              |
|                                       | 992 | 1012 | <b>-0.104</b> | <b>0.021</b> | 466 | 439 | 0.028         | 0.225        |
| <b>Cingulate</b>                      |     |      |               |              |     |     |               |              |
| Rostral Anterior (Frontal)            | 989 | 1013 | -0.009        | 0.841        | 466 | 437 | 0.129         | 0.401        |
| Caudal Anterior (Frontal)             | 985 | 1010 | 0.018         | 0.694        | 467 | 438 | <b>0.078</b>  | <b>0.024</b> |
| Posterior (Parietal)                  | 989 | 1015 | <b>0.117</b>  | <b>0.010</b> | 467 | 439 | <b>0.161</b>  | <b>0.000</b> |
| Isthmus (Parietal)                    | 990 | 1010 | <b>0.101</b>  | <b>0.025</b> | 468 | 437 | 0.031         | 0.118        |
| <b>Parietal</b>                       |     |      |               |              |     |     |               |              |
| Superior Parietal                     | 992 | 1015 | 0.017         | 0.707        | 468 | 438 | -0.090        | 0.140        |
| Inferior Parietal                     | 992 | 1016 | 0.085         | 0.060        | 468 | 439 | -0.154        | 0.310        |
| Supramarginal                         | 992 | 1013 | -0.094        | 0.037        | 467 | 438 | -0.057        | 0.225        |
| Postcentral                           | 990 | 1014 | -0.011        | 0.815        | 466 | 439 | <b>-0.067</b> | <b>0.000</b> |
| Precuneus                             | 991 | 1016 | 0.069         | 0.128        | 468 | 439 | -0.023        | 0.240        |
| <b>Temporal</b>                       |     |      |               |              |     |     |               |              |
| Superior temporal                     | 991 | 1014 | <b>-0.085</b> | <b>0.059</b> | 466 | 438 | -0.080        | 0.684        |
| Middle temporal                       | 992 | 1014 | <b>-0.110</b> | <b>0.015</b> | 467 | 438 | <b>-0.107</b> | <b>0.000</b> |
| Inferior temporal                     | 991 | 1014 | <b>-0.113</b> | <b>0.013</b> | 468 | 439 | <b>-0.247</b> | <b>0.002</b> |
| Banks of the Superior Temporal Sulcus | 992 | 1015 | -0.037        | 0.419        | 464 | 438 | <b>-0.050</b> | <b>0.000</b> |
| Fusiform                              | 990 | 1013 | <b>-0.163</b> | <b>0.000</b> | 468 | 439 | <b>-0.273</b> | <b>0.006</b> |
| Transverse Temporal                   | 992 | 1015 | <b>-0.123</b> | <b>0.006</b> | 468 | 437 | -0.101        | 0.225        |
| Entorhinal                            | 989 | 1012 | <b>-0.207</b> | <b>0.000</b> | 468 | 437 | <b>-0.185</b> | <b>0.021</b> |
| Temporal Pole                         | 988 | 1012 | <b>-0.128</b> | <b>0.005</b> | 463 | 434 | -0.128        | 0.225        |
| Parahippocampal                       | 987 | 1013 | <b>-0.129</b> | <b>0.004</b> | 468 | 437 | -0.085        | 0.748        |
| <b>Occipital</b>                      |     |      |               |              |     |     |               |              |
| Lateral Occipital                     | 989 | 1014 | -0.026        | 0.572        | 468 | 437 | -0.157        | 0.211        |
| Lingual                               | 990 | 1013 | -0.050        | 0.274        | 468 | 439 | <b>-0.069</b> | <b>0.032</b> |
| Cuneus                                | 989 | 1011 | 0.076         | 0.094        | 468 | 439 | 0.083         | 0.649        |
| Pericalcarine                         | 989 | 1008 | 0.021         | 0.641        | 468 | 438 | -0.022        | 0.059        |

*Fractional Polynomial Fit of Age for subcortical and cortical partitions*

**TABLE S11. Fractional Polynomial Best Model Fits for the Entire Sample, for both subjects with ASD and healthy controls separately, showing their coefficients after fitting. The optimal one- or two-term model was selected with the possible powers of -2, -1, -0.5, 0, 0.5, 1, 2 and 3. The “I( )” model indicates the use of a specific power function ‘as is’ in the model , without incorporating lower order powers of the same variable.**

|                                | <b>Model ASD</b>                                                                | <b>Model Controls</b>                                                       |
|--------------------------------|---------------------------------------------------------------------------------|-----------------------------------------------------------------------------|
| Thalamus                       | $\log((\text{Age}/10)) + I(\log((\text{Age}/10))^2)$                            | $\log((\text{Age}/10)) + I((\text{Age}/10)^{0.5})$                          |
| Caudate                        | $I((\text{Age}/10)^{-2})$                                                       | $\log((\text{Age}/10)) + I(\log((\text{Age}/10))^2)$                        |
| Putamen                        | $I((\text{Age}/10)^{-2})$                                                       | $\log((\text{Age}/10)) + I((\text{Age}/10)^{0.5})$                          |
| Amygdala                       | $\log((\text{Age}/10)) + I(\log((\text{Age}/10))^2)$                            | $\log((\text{Age}/10)) + I((\text{Age}/10)^{0.5})$                          |
| Nucleus accumbens              | $\log((\text{Age}/10)) + I(\log((\text{Age}/10))^2)$                            | $\log((\text{Age}/10)) + I((\text{Age}/10)^{0.5})$                          |
| Lateral Ventricles             | $I((\text{Age}/10)^2) + I((\text{Age}/10)^3)$                                   | $I((\text{Age}/10)^1)$                                                      |
| ICV                            | $I((\text{Age}/10)^{-2}) + I((\text{Age}/10)^{-2} * \log((\text{Age}/10)))$     | $I((\text{Age}/10)^{-1})$                                                   |
| Superior Frontal               | $I((\text{Age}/10)^{-0.5}) + I((\text{Age}/10)^3)$                              | $I((\text{Age}/10)^{-2}) + I((\text{Age}/10)^{0.5})$                        |
| Rostral Middle Frontal         | $I((\text{Age}/10)^{-0.5}) + I((\text{Age}/10)^3)$                              | $I((\text{Age}/10)^{-2}) + I((\text{Age}/10)^1)$                            |
| Caudal Middle Frontal          | $I((\text{Age}/10)^{-0.5}) + I((\text{Age}/10)^3)$                              | $I((\text{Age}/10)^{-2}) + I((\text{Age}/10)^1)$                            |
| Pars Triangularis              | $\log((\text{Age}/10)) + I((\text{Age}/10)^3)$                                  | $I((\text{Age}/10)^{-2}) + I((\text{Age}/10)^{0.5})$                        |
| Pars Orbitalis                 | $\log((\text{Age}/10))$                                                         | $I((\text{Age}/10)^{-2}) + \log((\text{Age}/10))$                           |
| Medial Orbitofrontal           | $I((\text{Age}/10)^{-1}) + I((\text{Age}/10)^3)$                                | $I((\text{Age}/10)^{-2}) + \log((\text{Age}/10))$                           |
| Frontal Pole                   | $I((\text{Age}/10)^{-1}) + I((\text{Age}/10)^3)$                                | $\log((\text{Age}/10)) + I((\text{Age}/10)^3)$                              |
| Posterior (parietal) Cingulate | $I((\text{Age}/10)^1) + I((\text{Age}/10)^2)$                                   | $I((\text{Age}/10)^{-1}) + I((\text{Age}/10)^{-1} * \log((\text{Age}/10)))$ |
| Isthmus (parietal) Cingulate   | $I((\text{Age}/10)^{-0.5}) + I((\text{Age}/10)^{-0.5} * \log((\text{Age}/10)))$ | $I((\text{Age}/10)^{-1}) + I((\text{Age}/10)^{-1} * \log((\text{Age}/10)))$ |
| Middle temporal                | $I((\text{Age}/10)^{-1}) + I((\text{Age}/10)^{-1} * \log((\text{Age}/10)))$     | $I((\text{Age}/10)^{-2}) + I((\text{Age}/10)^{-1})$                         |
| Inferior temporal              | $I((\text{Age}/10)^{-2}) + I((\text{Age}/10)^{-1})$                             | $I((\text{Age}/10)^{-2}) + I((\text{Age}/10)^{-1})$                         |
| Fusiform                       | $I((\text{Age}/10)^{0.5}) + I((\text{Age}/10)^1)$                               | $I((\text{Age}/10)^{-1}) + I((\text{Age}/10)^{-1} * \log((\text{Age}/10)))$ |
| Transverse Temporal            | $I((\text{Age}/10)^{-0.5}) + \log((\text{Age}/10))$                             | $I((\text{Age}/10)^{-1}) + I((\text{Age}/10)^{-1} * \log((\text{Age}/10)))$ |
| Entorhinal                     | $I((\text{Age}/10)^{0.5}) + I((\text{Age}/10)^2)$                               | $I((\text{Age}/10)^2) + I((\text{Age}/10)^2 * \log((\text{Age}/10)))$       |
| Temporal Pole                  | $I((\text{Age}/10)^{-1}) + I((\text{Age}/10)^3)$                                | $I((\text{Age}/10)^2) + I((\text{Age}/10)^2 * \log((\text{Age}/10)))$       |
| Parahippocampal                | $I((\text{Age}/10)^{-1}) + I((\text{Age}/10)^{-0.5})$                           | $I((\text{Age}/10)^2) + I((\text{Age}/10)^2 * \log((\text{Age}/10)))$       |

*Permutation based mega-analysis of ASD vs Control effect.*

In order to directly compare the current results to the effects reported by (Haar, Berman, Behrmann, & Dinstein, 2014), who also employed the ABIDE cohort, we repeated the main diagnostic effect analysis using a permutation based method. For this randomization test, the labels of ASD vs Control were randomly shuffled across rows for a particular morphometric feature, and the difference measure between the two groups was calculated. This process was repeated 10000 times to create a distribution of differences expected by chance. The true distribution was compared to the random distribution, and the place of the observed effect in the distribution was translated to a p-value, which were subsequently FDR corrected for multiple comparisons. A corrected p-value of <.05 indicates a diagnosis effect significantly different from the expected averrandom effect.

**TABLE S12. FDR Corrected p Values Calculated by Permutation Based Randomization Test. Bold values indicate a group difference significantly different from the random distribution mean.**

| <b>Subcortical</b>         | <b>Permutation (p value)</b> |
|----------------------------|------------------------------|
| Lateral Ventricles         | <b>0.001</b>                 |
| Thalamus                   | 0.775                        |
| Caudate                    | 0.188                        |
| Putamen                    | <b>0.0417</b>                |
| Pallidum                   | <b>0.0760</b>                |
| Hippocampus                | 0.2703                       |
| Amygdala                   | <b>0.0417</b>                |
| Nucleus accumbens          | <b>0.0207</b>                |
| <b>Frontal</b>             |                              |
| Superior Frontal           | 0.116                        |
| Rostral Middle Frontal     | <b>0.044</b>                 |
| Caudal Middle Frontal      | <b>0.049</b>                 |
| Pars Triangularis          | <b>0.030</b>                 |
| Pars Orbitalis             | <b>0.031</b>                 |
| Pars Opercularis           | <b>0.044</b>                 |
| Medial Orbitofrontal       | <b>0.044</b>                 |
| Lateral Orbitofrontal      | <b>0.034</b>                 |
| Precentral                 | <b>0.051</b>                 |
| Paracentral                | <b>0.031</b>                 |
| Frontal Pole               | 0.452                        |
| <b>Insula</b>              |                              |
|                            | 0.525                        |
| <b>Cingulate</b>           |                              |
| Rostral Anterior (Frontal) | 0.089                        |
| Caudal Anterior (Frontal)  | 0.205                        |
| Posterior (Parietal)       | 0.031                        |
| Isthmus (Parietal)         | 0.260                        |
| <b>Parietal</b>            |                              |
| Superior Parietal          | 0.148                        |
| Inferior Parietal          | 0.139                        |

|                                       |              |
|---------------------------------------|--------------|
| Supramarginal                         | 0.084        |
| Postcentral                           | <b>0.030</b> |
| Precuneus                             | <b>0.044</b> |
| <b>Temporal</b>                       |              |
| Superior temporal                     | 0.188        |
| Middle temporal                       | 0.260        |
| Inferior temporal                     | 0.450        |
| Banks of the Superior Temporal Sulcus | <b>0.030</b> |
| Fusiform                              | <b>0.035</b> |
| Transverse Temporal                   | 0.202        |
| Entorhinal                            | <b>0.008</b> |
| Temporal Pole                         | 0.450        |
| Parahippocampal                       | 0.200        |
| <b>Occipital</b>                      |              |
| Lateral Occipital                     | 0.638        |
| Lingual                               | 0.260        |
| Cuneus                                | 0.187        |
| Pericalcarine                         | 0.187        |

*Meta analysis results split by site*

In Table S13 we present the effects sizes of the meta-analysis on subcortical volumes split by participating site. Differences in both the direction and the size of the effects can be observed for all volumes. It is to be noted that many if not most of the individual samples do not show a significant main effect of diagnosis on cortical thickness or subcortical volumes. This demonstrates the care needed to be taken when interpreting findings in small homogenous samples of ASD subjects.

**TABLE S13. Effects Sizes (Cohen's d) for Frontal and Temporal Cortical Thickness Partitions That Showed a Significant Group Effect in the Main Mega-Analysis, As Well As All Subcortical Volumes for All Participating Sites. Significant effects are bold and in color. Red values indicate a negative d-value, with lower thickness/volume in ASD. Green values indicate a positive d-value, with greater thickness or volume values in ASD.**

| <b>Frontal Partitions</b> | <b>Superior Frontal</b> | <b>Rostral Middle Frontal</b> | <b>Caudal Middle Frontal</b> | <b>Pars Triangularis</b> | <b>Pars Orbitalis</b> | <b>Medial Orbitofrontal</b> | <b>Frontal Pole</b> | <b>Posterior (Parietal)</b> | <b>Isthmus (Parietal)</b> |
|---------------------------|-------------------------|-------------------------------|------------------------------|--------------------------|-----------------------|-----------------------------|---------------------|-----------------------------|---------------------------|
| ABIDE_CALTECH             | <b>-0.78</b>            | -0.53                         | <b>-0.78</b>                 | -0.52                    | -0.64                 | 0.04                        | -0.40               | -0.24                       | 0.11                      |
| ABIDE_KKI                 | -0.30                   | -0.05                         | -0.34                        | 0.05                     | -0.07                 | 0.03                        | -0.19               | 0.14                        | 0.22                      |
| ABIDE_LEUVEN_1            | 0.24                    | 0.21                          | 0.42                         | -0.17                    | 0.19                  | -0.44                       | -0.11               | 0.46                        | 0.25                      |
| ABIDE_LEUVEN_2            | <b>0.77</b>             | 0.48                          | <b>1.05</b>                  | 0.58                     | <b>0.93</b>           | -0.13                       | -0.56               | <b>0.90</b>                 | 0.04                      |
| ABIDE_MAX_MUN             | 0.31                    | -0.32                         | -0.08                        | 0.41                     | 0.08                  | <b>0.69</b>                 | 0.10                | -0.19                       | -0.43                     |
| ABIDE_NYU                 | <b>1.25</b>             | <b>1.84</b>                   | <b>1.04</b>                  | <b>0.95</b>              | <b>0.55</b>           | <b>0.84</b>                 | <b>0.75</b>         | <b>1.10</b>                 | <b>0.88</b>               |
| ABIDE_OHSU                | 0.22                    | -0.04                         | 0.12                         | 0.05                     | -0.16                 | -0.09                       | -0.26               | 0.86                        | 0.58                      |
| ABIDE_OLIN                | 0.17                    | 0.25                          | 0.36                         | 0.12                     | -0.01                 | -0.23                       | 0.26                | -0.19                       | 0.08                      |
| ABIDE_PITT                | <b>1.35</b>             | <b>1.21</b>                   | <b>1.45</b>                  | 0.68                     | <b>0.90</b>           | 0.43                        | <b>1.04</b>         | 0.28                        | -0.20                     |
| ABIDE_SBL                 | 0.48                    | 0.11                          | -0.07                        | 0.47                     | 0.50                  | 0.68                        | 0.30                | 0.42                        | 0.17                      |
| ABIDE_SDSU                | <b>-0.80</b>            | <b>-1.34</b>                  | <b>-1.28</b>                 | <b>-1.14</b>             | <b>-1.09</b>          | -0.42                       | 0.07                | -0.29                       | 0.20                      |
| ABIDE_STANFORD            | -0.23                   | -0.01                         | 0.04                         | 0.13                     | -0.12                 | 0.43                        | -0.33               | 0.73                        | 0.89                      |
| ABIDE_UM_1                | 0.25                    | 0.32                          | 0.06                         | 0.20                     | 0.36                  | 0.03                        | 0.17                | -0.07                       | -0.20                     |
| ABIDE_UM_2                | -0.06                   | -0.36                         | -0.41                        | -0.14                    | -0.60                 | 0.29                        | -0.24               | -0.03                       | 0.27                      |
| ABIDE_USM                 | -0.04                   | <b>0.68</b>                   | 0.04                         | 0.35                     | <b>0.63</b>           | 0.35                        | <b>0.66</b>         | <b>-0.88</b>                | <b>-0.63</b>              |
| ABIDE_YALE                | <b>-1.85</b>            | <b>-2.44</b>                  | <b>-1.83</b>                 | <b>-2.28</b>             | <b>-2.04</b>          | <b>-2.76</b>                | <b>-2.51</b>        | <b>-1.35</b>                | <b>-1.13</b>              |
| ABIDEII-BNI_1             | -0.10                   | -0.31                         | -0.44                        | 0.12                     | -0.03                 | -0.38                       | -0.20               | 0.08                        | 0.15                      |
| ABIDEII-EMC_1             | 0.04                    | 0.27                          | 0.14                         | 0.25                     | 0.27                  | 0.39                        | 0.31                | 0.13                        | 0.20                      |
| ABIDEII-ETH_1             | -0.07                   | 0.32                          | -0.37                        | 0.30                     | 0.03                  | 0.37                        | 0.24                | 0.30                        | 0.22                      |
| ABIDEII-GU_1              | <b>-0.52</b>            | -0.39                         | <b>-0.56</b>                 | <b>-0.60</b>             | <b>-0.49</b>          | -0.20                       | -0.27               | 0.05                        | 0.02                      |
| ABIDEII-IP_1              | -0.20                   | -0.25                         | -0.43                        | -0.14                    | -0.26                 | -0.16                       | 0.23                | 0.04                        | 0.16                      |
| ABIDEII-IU_1              | 0.26                    | 0.24                          | 0.19                         | -0.16                    | 0.11                  | 0.06                        | 0.28                | 0.67                        | -0.01                     |
| ABIDEII-KKI_1             | <b>-0.42</b>            | -0.27                         | <b>-0.43</b>                 | -0.20                    | -0.19                 | -0.22                       | 0.15                | -0.12                       | 0.01                      |

|                |             |              |              |             |             |             |             |             |             |
|----------------|-------------|--------------|--------------|-------------|-------------|-------------|-------------|-------------|-------------|
| ABIDEII-NYU_1  | -0.31       | 0.07         | -0.10        | -0.07       | 0.16        | 0.14        | -0.08       | 0.37        | 0.06        |
| ABIDEII-OHSU_1 | -0.20       | -0.04        | -0.25        | 0.00        | 0.15        | 0.05        | -0.05       | -0.11       | 0.06        |
| ABIDEII-OILH_2 | 0.36        | 0.28         | 0.32         | 0.58        | 0.29        | 0.20        | 0.62        | -0.31       | -0.31       |
| ABIDEII-SDSU_1 | -0.06       | 0.03         | 0.05         | -0.34       | 0.04        | 0.30        | -0.08       | 0.31        | -0.16       |
| ABIDEII-TCD_1  | -0.42       | -0.18        | <b>-0.70</b> | -0.35       | -0.01       | 0.12        | 0.09        | 0.21        | -0.42       |
| ABIDEII-UCD_1  | -0.47       | -0.46        | -0.46        | -0.24       | 0.11        | -0.13       | -0.25       | 0.67        | 0.01        |
| ABIDEII-UCLA_1 | -0.11       | 0.33         | -0.06        | 0.07        | 0.31        | 0.77        | 0.20        | 0.05        | 0.18        |
| ABIDEII-USM_1  | -0.40       | <b>-0.81</b> | -0.41        | -0.39       | -0.40       | -0.23       | 0.05        | 0.06        | 0.08        |
| BRC            | 0.04        | 0.06         | 0.17         | -0.25       | -0.05       | 0.20        | -0.35       | 0.21        | -0.24       |
| CMU            | 0.06        | -0.38        | 0.73         | -0.18       | -0.76       | 0.07        | -0.20       | 0.17        | -0.28       |
| FRANKFURT      | 0.23        | -0.21        | 0.56         | 0.18        | 0.45        | 0.44        | <b>0.94</b> | -0.18       | 0.20        |
| FSM            | 0.34        | 0.09         | 0.37         | -0.20       | 0.03        | -0.28       | 0.11        | 0.03        | 0.09        |
| MRC            | 0.19        | 0.26         | 0.28         | 0.24        | 0.04        | -0.08       | 0.01        | 0.15        | 0.00        |
| MYAD           | 0.28        | 0.27         | 0.37         | 0.05        | -0.07       | 0.40        | 0.32        | -0.02       | 0.21        |
| NIJMEGEN1      | 0.35        | 0.28         | 0.23         | -0.21       | 0.26        | 0.28        | -0.02       | -0.05       | -0.28       |
| NIJMEGEN2      | 0.43        | 0.21         | 0.41         | 0.29        | -0.43       | <b>0.57</b> | -0.08       | 0.40        | 0.28        |
| NIJMEGEN3      | -0.14       | -0.22        | -0.13        | -0.30       | -0.08       | -0.13       | -0.34       | <b>0.58</b> | -0.40       |
| SAO PAULO      | <b>0.87</b> | -0.51        | <b>0.78</b>  | -0.47       | -0.26       | -0.48       | -0.18       | -0.44       | 0.19        |
| OHSU           | 0.20        | 0.17         | 0.03         | 0.19        | 0.29        | 0.31        | 0.06        | -0.02       | 0.12        |
| ParelladaHGGM  | -0.20       | -0.46        | 0.45         | -0.23       | -0.30       | -0.47       | -0.09       | -0.07       | 0.08        |
| PITT           | -0.24       | 0.06         | 0.34         | -0.15       | -0.40       | 0.43        | -0.33       | -0.12       | 0.17        |
| TCD            | -0.33       | -0.27        | <b>0.46</b>  | 0.07        | 0.19        | -0.08       | -0.07       | 0.04        | 0.11        |
| TORONTO        | 0.50        | -0.06        | 0.03         | 0.34        | -0.14       | 0.19        | 0.80        | 0.52        | 0.44        |
| UMCU           | -0.09       | -0.08        | -0.11        | -0.02       | 0.13        | 0.03        | 0.21        | -0.15       | 0.18        |
| META           | <b>0.11</b> | <b>0.11</b>  | 0.06         | 0.05        | 0.04        | 0.08        | 0.04        | 0.05        | 0.05        |
| MEGA           | <b>0.17</b> | <b>0.20</b>  | <b>0.08</b>  | <b>0.11</b> | <b>0.12</b> | <b>0.15</b> | <b>0.10</b> | <b>0.13</b> | <b>0.08</b> |

| Temporal Partitions | Middle       | Inferior     | Transverse   |              | Temporal     |              |                 | Overall Mean Thickness |
|---------------------|--------------|--------------|--------------|--------------|--------------|--------------|-----------------|------------------------|
|                     | Temporal     | Temporal     | Fusiform     | Temporal     | Entorhinal   | Pole         | Parahippocampal |                        |
| ABIDE_CALTECH       | <b>-0.92</b> | -0.53        | -0.31        | -0.28        | -0.31        | -0.17        | -0.44           | -0.68                  |
| ABIDE_KKI           | 0.12         | 0.33         | 0.33         | -0.24        | 0.14         | -0.03        | -0.02           | 0.16                   |
| ABIDE_LEUVEN_1      | 0.24         | 0.09         | 0.25         | -0.03        | 0.17         | 0.10         | 0.05            | 0.11                   |
| ABIDE_LEUVEN_2      | <b>0.97</b>  | <b>0.88</b>  | 0.62         | 0.05         | 0.03         | 0.51         | 0.12            | <b>0.83</b>            |
| ABIDE_MAX_MUN       | <b>0.88</b>  | <b>0.72</b>  | <b>0.72</b>  | <b>0.65</b>  | <b>1.52</b>  | <b>1.01</b>  | <b>1.09</b>     | 0.42                   |
| ABIDE_NYU           | <b>-1.03</b> | <b>-1.17</b> | <b>-1.13</b> | <b>-1.43</b> | <b>-2.01</b> | <b>-1.36</b> | <b>-0.77</b>    | -0.14                  |
| ABIDE_OHSU          | 0.48         | 0.59         | 0.41         | 0.61         | -0.18        | 0.11         | 0.47            | 0.44                   |
| ABIDE_OLIN          | 0.62         | 0.47         | 0.38         | -0.58        | 0.33         | 0.51         | -0.26           | 0.20                   |
| ABIDE_PITT          | -0.19        | 0.29         | -0.18        | -0.61        | -0.38        | 0.05         | -0.46           | 0.72                   |
| ABIDE_SBL           | -0.08        | 0.25         | 0.62         | 0.51         | 0.10         | -0.02        | <b>0.91</b>     | 0.64                   |
| ABIDE_SDSU          | <b>-0.97</b> | <b>-0.84</b> | -0.24        | -0.27        | 0.30         | 0.42         | -0.32           | <b>-0.99</b>           |
| ABIDE_STANFORD      | 0.68         | 0.64         | 0.92         | 0.40         | 0.22         | 0.38         | 0.41            | 0.58                   |
| ABIDE_UM_1          | -0.29        | -0.37        | <b>-0.61</b> | <b>-0.43</b> | -0.38        | -0.17        | -0.25           | -0.38                  |
| ABIDE_UM_2          | -0.33        | -0.25        | -0.34        | 0.29         | -0.46        | -0.67        | 0.31            | -0.14                  |
| ABIDE_USM           | 0.18         | -0.20        | <b>-0.47</b> | <b>-0.53</b> | -0.20        | -0.01        | <b>-0.45</b>    | -0.34                  |
| ABIDE_YALE          | <b>-1.98</b> | <b>-2.14</b> | <b>-1.67</b> | <b>-1.80</b> | <b>-0.86</b> | <b>-1.23</b> | <b>-1.03</b>    | <b>-2.40</b>           |
| ABIDEII-BNI_1       | 0.08         | 0.20         | 0.06         | 0.28         | -0.44        | -0.08        | -0.54           | -0.04                  |
| ABIDEII-EMC_1       | -0.10        | -0.14        | -0.06        | -0.45        | 0.18         | 0.17         | 0.04            | 0.14                   |
| ABIDEII-ETH_1       | -0.70        | -0.35        | -0.66        | 0.51         | -0.50        | 0.04         | 0.12            | -0.04                  |
| ABIDEII-GU_1        | <b>-0.49</b> | <b>-0.51</b> | <b>-0.53</b> | -0.25        | -0.37        | <b>-0.50</b> | -0.33           | <b>-0.56</b>           |
| ABIDEII-IP_1        | -0.38        | -0.53        | -0.56        | 0.07         | -0.47        | <b>-1.00</b> | -0.36           | -0.40                  |
| ABIDEII-IU_1        | -0.20        | 0.02         | -0.25        | -0.24        | -0.54        | -0.50        | 0.19            | 0.01                   |
| ABIDEII-KKI_1       | <b>-0.39</b> | <b>-0.36</b> | <b>-0.36</b> | 0.02         | <b>-0.32</b> | <b>-0.41</b> | -0.30           | <b>-0.42</b>           |
| ABIDEII-NYU_1       | -0.05        | -0.10        | 0.01         | 0.18         | -0.23        | 0.09         | -0.06           | 0.00                   |
| ABIDEII-OHSU_1      | -0.07        | 0.38         | -0.14        | -0.03        | 0.04         | -0.12        | -0.06           | -0.12                  |
| ABIDEII-OILH_2      | 0.12         | -0.37        | -0.27        | <b>0.65</b>  | -0.21        | -0.29        | -0.54           | 0.14                   |
| ABIDEII-SDSU_1      | -0.21        | -0.18        | -0.14        | 0.25         | -0.46        | -0.37        | -0.37           | 0.06                   |
| ABIDEII-TCD_1       | -0.07        | -0.30        | -0.15        | -0.11        | -0.42        | -0.23        | 0.16            | -0.25                  |



|                |              |              |              |              |              |              |              |              |
|----------------|--------------|--------------|--------------|--------------|--------------|--------------|--------------|--------------|
| ABIDEII-UCD_1  | -0.53        | -0.24        | -0.21        | <b>0.82</b>  | -0.15        | 0.37         | -0.36        | -0.11        |
| ABIDEII-UCLA_1 | -0.18        | -0.22        | -0.23        | -0.24        | -0.29        | -0.44        | <b>-1.22</b> | -0.08        |
| ABIDEII-USM_1  | 0.04         | 0.08         | 0.01         | 0.42         | -0.09        | 0.06         | <b>0.96</b>  | 0.00         |
| BRC            | -0.01        | -0.08        | -0.18        | 0.17         | 0.05         | -0.13        | 0.53         | 0.05         |
| CMU            | -0.12        | -0.41        | -0.57        | -0.49        | -0.62        | -0.29        | -0.46        | -0.68        |
| FRANKFURT      | 0.15         | 0.36         | 0.24         | 0.78         | 0.44         | -0.11        | -0.31        | 0.55         |
| FSM            | -0.14        | <b>-0.70</b> | <b>-0.48</b> | 0.10         | -0.40        | <b>-0.56</b> | 0.10         | 0.03         |
| MRC            | -0.05        | -0.12        | -0.16        | 0.03         | -0.15        | -0.12        | -0.10        | 0.06         |
| MYAD           | 0.38         | -0.15        | -0.15        | -0.02        | -0.07        | 0.12         | -0.28        | 0.36         |
| NIJMEGEN1      | 0.32         | 0.42         | 0.15         | 0.19         | 0.29         | 0.29         | 0.17         | 0.44         |
| NIJMEGEN2      | 0.01         | -0.07        | 0.32         | 0.00         | 0.49         | 0.26         | 0.28         | 0.33         |
| NIJMEGEN3      | -0.32        | -0.03        | -0.14        | -0.28        | -0.05        | -0.06        | -0.28        | -0.18        |
| SAO PAULO      | -0.12        | -0.08        | -0.55        | -0.42        | -0.25        | -0.14        | -0.33        | -0.66        |
| OHSU           | 0.03         | 0.07         | -0.17        | 0.39         | -0.19        | 0.06         | 0.29         | 0.10         |
| ParelladaHGGM  | -0.24        | -0.32        | -0.18        | -0.35        | -0.14        | -0.11        | -0.09        | -0.37        |
| PITT           | -0.21        | -0.13        | -0.05        | -0.09        | <b>-0.58</b> | -0.08        | -0.13        | -0.20        |
| TCD            | -0.19        | -0.01        | 0.01         | 0.05         | <b>-0.44</b> | -0.21        | -0.28        | -0.04        |
| TORONTO        | 0.87         | 0.58         | 0.50         | 0.50         | -0.12        | <b>-1.02</b> | 0.02         | 0.41         |
| UMCU           | -0.10        | 0.10         | -0.12        | 0.00         | -0.03        | -0.14        | 0.24         | 0.01         |
| META           | <b>-0.12</b> | <b>-0.16</b> | <b>-0.19</b> | <b>-0.24</b> | <b>-0.24</b> | <b>-0.14</b> | <b>-0.11</b> | <b>-0.07</b> |
| MEGA           | <b>-0.10</b> | <b>-0.14</b> | <b>-0.19</b> | <b>-0.12</b> | <b>-0.21</b> | <b>-0.13</b> | <b>-0.10</b> | <b>-0.41</b> |

| Subcortical Volumes | Thalamus | Caudate | Putamen | Pallidum | Hippocampus | Amygdala | Accumbens | Lateral Ventricles | ICV   |
|---------------------|----------|---------|---------|----------|-------------|----------|-----------|--------------------|-------|
| ABIDE_CALTECH       | 0.23     | -0.02   | -0.11   | 0.75     | -0.04       | -0.42    | -0.06     | 0.17               | 0.31  |
| ABIDE_KKI           | 0.24     | -0.19   | -0.17   | 0.71     | -0.52       | 0.18     | -0.38     | -0.18              | 1.03  |
| ABIDE_LEUVEN_1      | 0.14     | -0.04   | 0.51    | 0.84     | 0.27        | 0.6      | 0.17      | -0.12              | 0.47  |
| ABIDE_LEUVEN_2      | 0.56     | 0.46    | 0.18    | -0.04    | -0.21       | -0.1     | 0.93      | -0.35              | 0.49  |
| ABIDE_MAX_MUN       | -0.15    | -0.4    | -0.58   | 0.76     | -0.27       | 0.3      | 0.01      | 0.14               | 0.8   |
| ABIDE_NYU           | -0.21    | -0.23   | -0.68   | -0.79    | 0.17        | -0.39    | -1.01     | 0.08               | -0.52 |
| ABIDE_OHSU          | -0.15    | 0.86    | 0.54    | 0.1      | -0.27       | 0.3      | 0.75      | 0.82               | 0.54  |
| ABIDE_OLIN          | -0.6     | -0.05   | -0.43   | -0.64    | -0.84       | 0.08     | -0.38     | 0.62               | -0.17 |
| ABIDE_PITT          | 0.43     | -0.36   | -0.81   | -0.52    | 0.63        | -0.76    | -0.92     | 0.13               | -0.29 |
| ABIDE_SBL           | -0.18    | -0.19   | 0.82    | 0.58     | -0.44       | 0.44     | 0.26      | -1.03              | 0.26  |
| ABIDE_SDSU          | 0.31     | -0.12   | 0.46    | -0.38    | 1.07        | 1.17     | 1.1       | 0.39               | -0.29 |
| ABIDE_STANFORD      | 0.18     | 0.23    | -0.05   | 0.96     | -0.15       | 0.08     | 0.42      | 0.13               | 1.24  |
| ABIDE_UM_1          | 0.55     | 0.19    | -0.73   | 0.08     | -0.61       | -0.73    | -0.4      | 0.21               | 0.33  |
| ABIDE_UM_2          | 0.07     | 0.28    | 0.04    | 0.16     | 0.37        | 0.02     | -0.4      | 0.32               | -0.48 |
| ABIDE_USM           | 0.26     | -0.29   | -1.33   | -0.52    | -0.09       | -0.59    | -1.35     | 0.36               | 0.93  |
| ABIDE_YALE          | -0.47    | -0.34   | 0.22    | -0.52    | -0.48       | 0.25     | 0.99      | 1.11               | -0.59 |
| ABIDEII-BNI_1       | -0.52    | 0.11    | 0.03    | -0.01    | -0.48       | -0.30    | -0.17     | 0.60               | 0.00  |
| ABIDEII-EMC_1       | 0.60     | 0.21    | 0.02    | 0.10     | 0.15        | -0.04    | -0.48     | 0.27               | -0.32 |
| ABIDEII-ETH_1       | 0.32     | 0.21    | -0.28   | 0.29     | 0.00        | -0.02    | -0.40     | 0.40               | -0.22 |
| ABIDEII-GU_1        | -0.62    | -0.11   | -0.03   | 0.14     | -0.25       | -0.31    | 0.09      | 0.19               | 0.13  |
| ABIDEII-IP_1        | -0.35    | -0.06   | 0.16    | 0.12     | 0.15        | -0.22    | -0.23     | -0.13              | 0.72  |
| ABIDEII-IU_1        | -0.14    | 0.06    | 0.60    | -0.21    | -0.37       | -0.09    | 0.32      | -0.02              | -0.53 |
| ABIDEII-KKI_1       | 0.10     | 0.16    | 0.29    | 0.11     | 0.16        | 0.10     | 0.32      | 0.07               | 0.14  |
| ABIDEII-NYU_1       | 0.21     | -0.18   | 0.11    | 0.06     | 0.20        | 0.01     | -0.07     | 0.08               | -0.03 |
| ABIDEII-OHSU_1      | 0.19     | -0.33   | -0.35   | -0.47    | 0.36        | -0.09    | -0.36     | -0.06              | 0.14  |
| ABIDEII-OILH_2      | 0.18     | 0.77    | 0.48    | 0.19     | -0.17       | 0.27     | 0.51      | 0.41               | -0.05 |
| ABIDEII-SDSU_1      | -0.08    | 0.15    | 0.36    | 0.15     | -0.18       | -0.19    | -0.21     | -0.02              | -0.19 |
| ABIDEII-TCD_1       | 0.08     | -0.13   | -0.39   | -0.06    | -0.14       | 0.24     | 0.12      | 0.15               | 0.70  |
| ABIDEII-UCD_1       | 0.26     | 0.76    | -0.36   | -0.27    | -0.03       | -0.12    | -0.08     | 0.83               | 0.20  |

|                |       |             |              |              |       |              |              |              |             |
|----------------|-------|-------------|--------------|--------------|-------|--------------|--------------|--------------|-------------|
| ABIDEII-UCLA_1 | 0.59  | <b>0.87</b> | 0.57         | 0.56         | -0.23 | -0.58        | 0.39         | -0.01        | -0.04       |
| ABIDEII-USM_1  | 0.38  | -0.10       | 0.34         | 0.37         | -0.03 | -0.43        | 0.35         | 0.23         | 0.50        |
| BRC            | 0     | 0.08        | -0.05        | -0.49        | 0.19  | -0.52        | -0.17        | -0.38        | 0.17        |
| CMU            | -0.05 | -0.17       | -0.2         | 0.01         | 0.61  | -0.08        | -0.12        | 0.37         | -0.14       |
| FRANKFURT      | -0.04 | 0.19        | <b>0.85</b>  | <b>0.81</b>  | 0.35  | 0.45         | <b>0.79</b>  | <b>-0.63</b> | 0.22        |
| FSM            | -0.24 | 0.1         | -0.28        | 0.42         | -0.2  | 0.04         | -0.13        | -0.25        | <b>0.74</b> |
| MRC            | -0.05 | 0.08        | 0.16         | -0.2         | -0.1  | -0.11        | 0.13         | 0.29         | 0.04        |
| MYAD           | 0.34  | -0.32       | 0.27         | 0            | 0.23  | 0.01         | -0.35        | 0.02         | 0.04        |
| NIJMEGEN1      | -0.02 | -0.39       | -0.3         | -0.09        | -0.03 | -0.27        | 0.02         | -0.58        | 0.15        |
| NIJMEGEN2      | -0.17 | 0.04        | -0.1         | -0.14        | -0.55 | -0.01        | -0.08        | 0.46         | <b>0.51</b> |
| NIJMEGEN3      | -0.11 | -0.33       | 0.4          | 0.11         | -0.22 | -0.18        | -0.19        | 0.06         | 0.1         |
| SAO PAULO      | -0.82 | -0.88       | -0.75        | -0.97        | -0.31 | -0.11        | -0.27        | 0.76         | 0.15        |
| OHSU           | 0.22  | 0.08        | -0.15        | -0.36        | 0.36  | 0.35         | -0.24        | -0.39        | 0.05        |
| ParelladaHGGM  | 0.13  | 0.50        | -0.07        | 0.27         | -0.32 | -0.02        | -0.13        | 0.28         | 0.03        |
| PITT           | -0.46 | -0.04       | -0.04        | -0.29        | 0.11  | 0.36         | -0.33        | 0.47         | 0.11        |
| TCD            | 0.46  | 0.08        | -0.2         | -0.06        | 0.03  | -0.49        | -0.2         | NA           | -0.02       |
| TORONTO        | -0.28 | -0.54       | -0.01        | -0.2         | -0.39 | -0.26        | -0.2         | 0.16         | -0.08       |
| UMCU           | 0.19  | 0.55        | 0.79         | 0.47         | 0.12  | -0.3         | 0.22         | 0.14         | 0.28        |
| META           | -0.09 | -0.05       | <b>-0.03</b> | -0.03        | -0.03 | -0.06        | -0.05        | <b>0.11</b>  | <b>0.10</b> |
| MEGA           | 0.00  | -0.05       | <b>-0.10</b> | <b>-0.08</b> | -0.05 | <b>-0.08</b> | <b>-0.13</b> | <b>0.11</b>  | <b>0.13</b> |

**FIGURE S2. Additional Fractional Polynomial Best Model Fits for Age in a Mega-Analysis of Brain Morphometry in Patients With Autism Spectrum Disorder (ASD) and Healthy Control Subjects.** These plots are in addition to those presented in Figure 3 in the main article. Models are shown (with separate fits for the ASD and control groups) for frontal cortical thickness (panel A), temporal cortical thickness (panel B), and subcortical volumes with significant diagnosis and age or age-by-diagnosis effects (panel C).

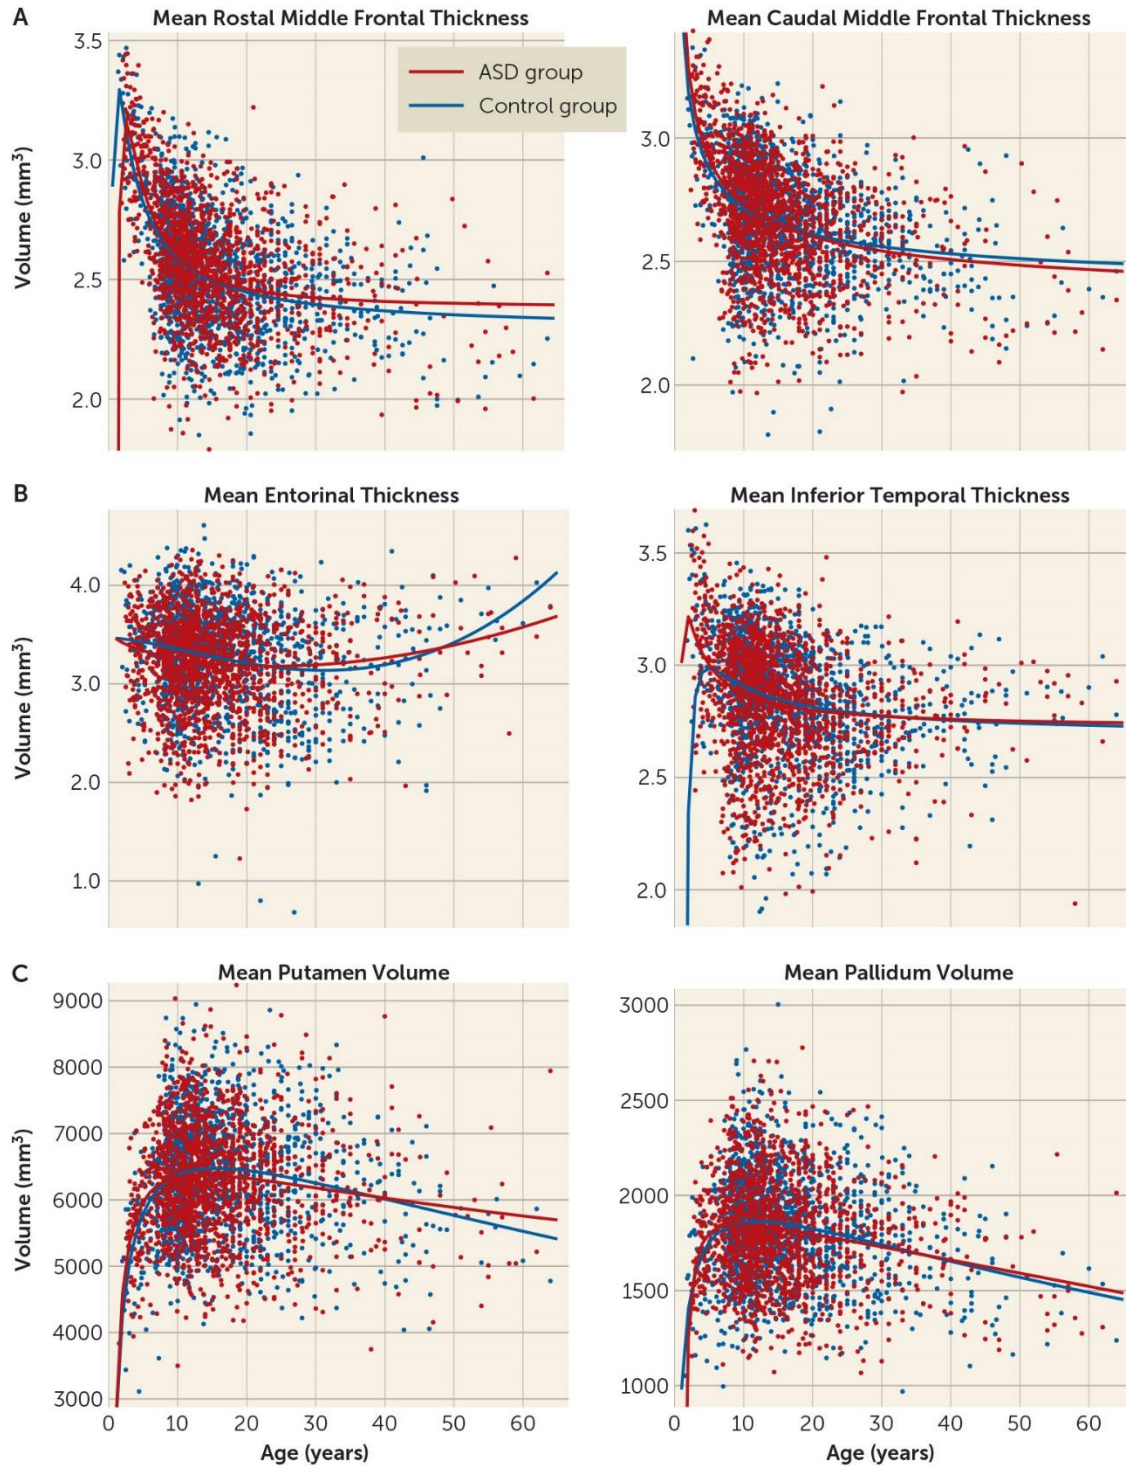

## REFERENCES

- Haar, S., Berman, S., Behrmann, M., & Dinstein, I. (2014). Anatomical Abnormalities in Autism? *Cerebral Cortex*, 1–13. <https://doi.org/10.1093/cercor/bhu242>
- Ho, D. E., Imai, K., King, G., & Stuart, E. A. (2011). MatchIt: Nonparametric Preprocessing for Parametric Causal Inference. *Journal of Statistical Software*, 42, 1–28.
- Lord, C., Risi, S., Lambrecht, L., Cook, E. H. J., Leventhal, B. L., DiLavore, P. C., ... Rutter, M. (2000). The Autism Diagnostic Schedule – Generic: A standard measures of social and communication deficits associated with the spectrum of autism. *Journal of Autism and Developmental Disorders*, 30(3), 205–223. <https://doi.org/10.1023/A:1005592401947>
